# Supplementary material for: Understanding the CO capture reaction through electronic structure analysis of four-membered-ring group-13/N- and B/group-15-based Lewis acid–base pairs
Source: Royal Society of Chemistry journal article supplement (doi:10.1039/d4ra03568b), 2024-01-01
Supplement: d4ra03568b1.pdf [file d4ra03568b1.pdf]

# Supporting Information

## Understanding CO Capture Reaction through Electronic Structure Analysis of Four-Membered-Ring Group-13/N- and B/Group-15-Based Lewis Acid-Base Pairs

Zheng-Feng Zhang<sup>1</sup> and Ming-Der Su<sup>1,2,a)</sup>

<sup>1</sup>Department of Applied Chemistry, National Chiayi University, Chiayi  
60004, Taiwan

<sup>2</sup>Department of Medicinal and Applied Chemistry, Kaohsiung Medical  
University, Kaohsiung 80708, Taiwan

<sup>a)</sup> E-mail: [midesu@mail.ncyu.edu.tw](mailto:midesu@mail.ncyu.edu.tw)

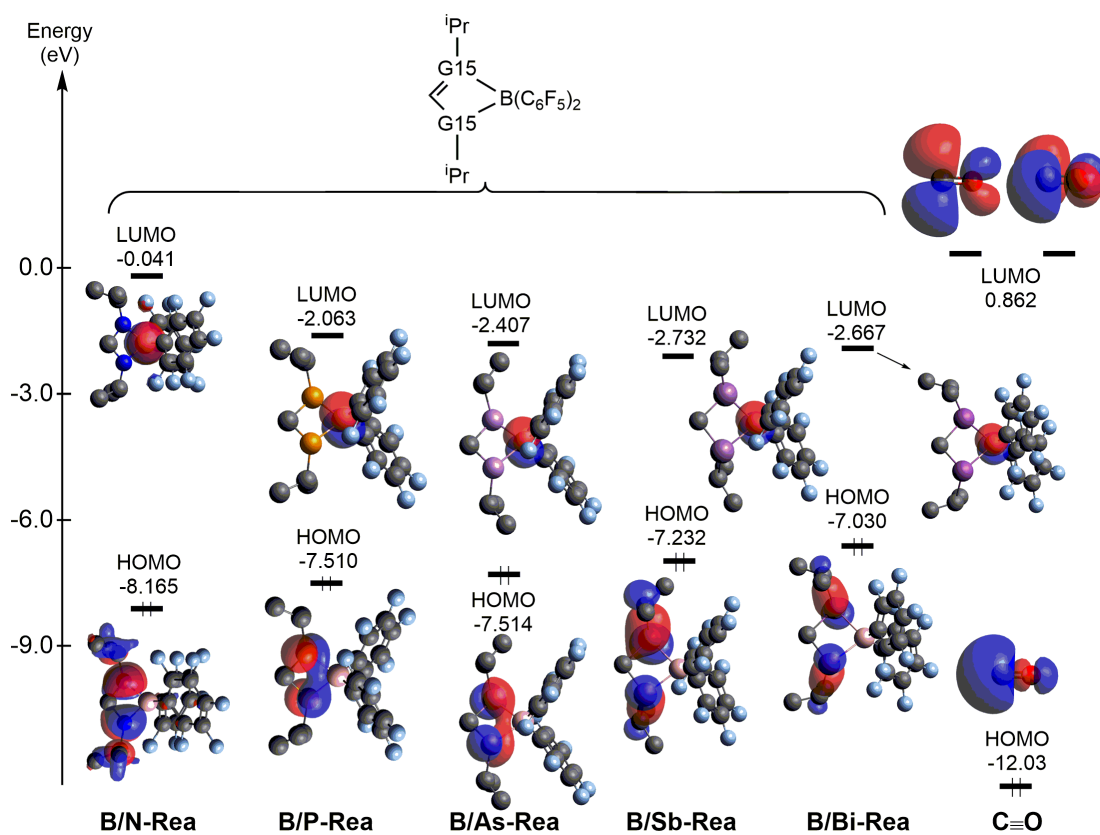

**Figure S1.** Energies of the frontier orbitals (HOMO and LUMO) of the model molecules **B/G15-Rea** and CO for comparison, computed at the M06-2X-D3/def2-TZVP level.

| System               | Energy difference                        | Energy difference                        |
|----------------------|------------------------------------------|------------------------------------------|
|                      | $ \text{CO (LUMO)} - \text{FLP (HOMO)} $ | $ \text{FLP (LUMO)} - \text{CO (HOMO)} $ |
| <b>B/N-Rea + CO</b>  | 9.027                                    | 11.99                                    |
| <b>B/P-Rea + CO</b>  | 8.372                                    | 9.975                                    |
| <b>B/As-Rea + CO</b> | 8.376                                    | 9.631                                    |
| <b>B/Sb-Rea + CO</b> | 8.094                                    | 9.306                                    |
| <b>B/Bi-Rea + CO</b> | 7.892                                    | 9.371                                    |

**Table S1.** The energy difference between the HOMO of **B/G15-Rea** and the LUMO of CO, as well as the energy difference between the HOMO of CO and the LUMO of **B/G15-Rea**. The energy values (in eV) see Figure S1. Energies of the frontier orbitals (HOMO and LUMO) of the model molecules **B/G15-Rea** and CO for comparison, computed at the M06-2X-D3/def2-TZVP level.

**Table S2.** EDA-NOCV results (kcal/mol) of **B/G15-TS** using both singlet-singlet and triplet-triplet models at the ZORA-M06-2X-D3/TZ2P//M06-2X-D3/def2-TZVP level.<sup>(a)</sup>

| Fragments                         | B/N-TS        |                | B/P-TS        |                | B/As-TS       |                | B/Sb-TS       |                | B/Bi-TS       |                |
|-----------------------------------|---------------|----------------|---------------|----------------|---------------|----------------|---------------|----------------|---------------|----------------|
|                                   | B/N-Rea (S)   | B/N-Rea (T)    | B/P-Rea (S)   | B/P-Rea (T)    | B/As-Rea (S)  | B/As-Rea (T)   | B/Sb-Rea (S)  | B/Sb-Rea (T)   | B/Bi-Rea (S)  | B/Bi-Rea (T)   |
|                                   | +             | +              | +             | +              | +             | +              | +             | +              | +             | +              |
|                                   | CO (S)        | CO (T)         |
| $\Delta E_{\text{INT}}^{(a)}$     | -6.6          | -215.6         | -6.5          | -190.2         | -6.2          | -189.2         | -6.0          | -182.9         | -5.6          | -175.8         |
| $\Delta E_{\text{Pauli}}$         | 59.1          | 49.4           | 33.3          | 48.5           | 26.1          | 42.7           | 22.9          | 22.1           | 38.6          | 34.6           |
| $\Delta E_{\text{Elstat}}^{(b)}$  | -30.2 (45.9%) | -34.7 (13.1%)  | -16.2 (40.7%) | -22.2 (9.3%)   | -12.6 (38.9%) | -17.5 (7.6%)   | -11.0 (38.0%) | -14.2 (6.9%)   | -18.9 (42.7%) | -19.7 (9.4%)   |
| $\Delta E_{\text{Orb}}^{(b)}$     | -27.8 (42.3%) | -222.6 (84.0%) | -15.2 (38.2%) | -208.2 (87.2%) | -11.4 (35.3%) | -206.1 (88.8%) | -9.2 (31.9%)  | -182.1 (88.8%) | -15.1 (34.3%) | -180.6 (85.8%) |
| $\Delta E_{\text{Orb (1)}}^{(c)}$ | -18.7 (67.2%) | -209.8 (94.2%) | -9.1 (59.6%)  | -193.5 (93.0%) | -6.3 (55.6%)  | -194.7 (94.5%) | -5.0 (54.3%)  | -177.0 (97.2%) | -8.5 (56.4%)  | -172.8 (95.7%) |
| $\Delta E_{\text{Orb (2)}}^{(c)}$ | -4.1 (14.7%)  | -7.6 (3.4%)    | -2.6 (17.0%)  | -13.7 (6.6%)   | -2.2 (19.2%)  | -10.5 (5.1%)   | -1.8 (19.1%)  | -4.7 (2.6%)    | -2.5 (16.3%)  | -3.5 (1.9%)    |
| $\Delta E_{\text{Rest}}^{(c)}$    | -5.0 (18.1%)  | -5.2 (2.3%)    | -3.6 (23.4%)  | -1.0 (0.5%)    | -2.9 (25.2%)  | -0.9 (0.4%)    | -2.5 (26.6%)  | -0.4 (0.2%)    | -4.1 (27.4%)  | -4.3 (2.4%)    |
| $\Delta E_{\text{Disper}}^{(b)}$  | -7.7 (11.7%)  | -7.7 (2.9%)    | -8.4 (21.1%)  | -8.4 (3.5%)    | -8.3 (25.8%)  | -8.3 (3.6%)    | -8.7 (30.1%)  | -8.7 (4.3%)    | -10.2 (23.0%) | -10.2 (4.8%)   |

(a) All energy values are given in kcal/mol.

(b)  $\Delta E_{\text{INT}} = \Delta E_{\text{Elstat}} + \Delta E_{\text{Pauli}} + \Delta E_{\text{Orb}} + \Delta E_{\text{Disper}}$ .

(c) The values, shown in parentheses, reflect the percentage contribution of attractive interactions to the overall total ( $\Delta E_{\text{Elstat}} + \Delta E_{\text{Orb}} + \Delta E_{\text{Disper}}$ ).

(d) The percentages shown in parentheses denote the contribution of each value to the overall orbital interactions ( $\Delta E_{\text{ORB}}$ ).

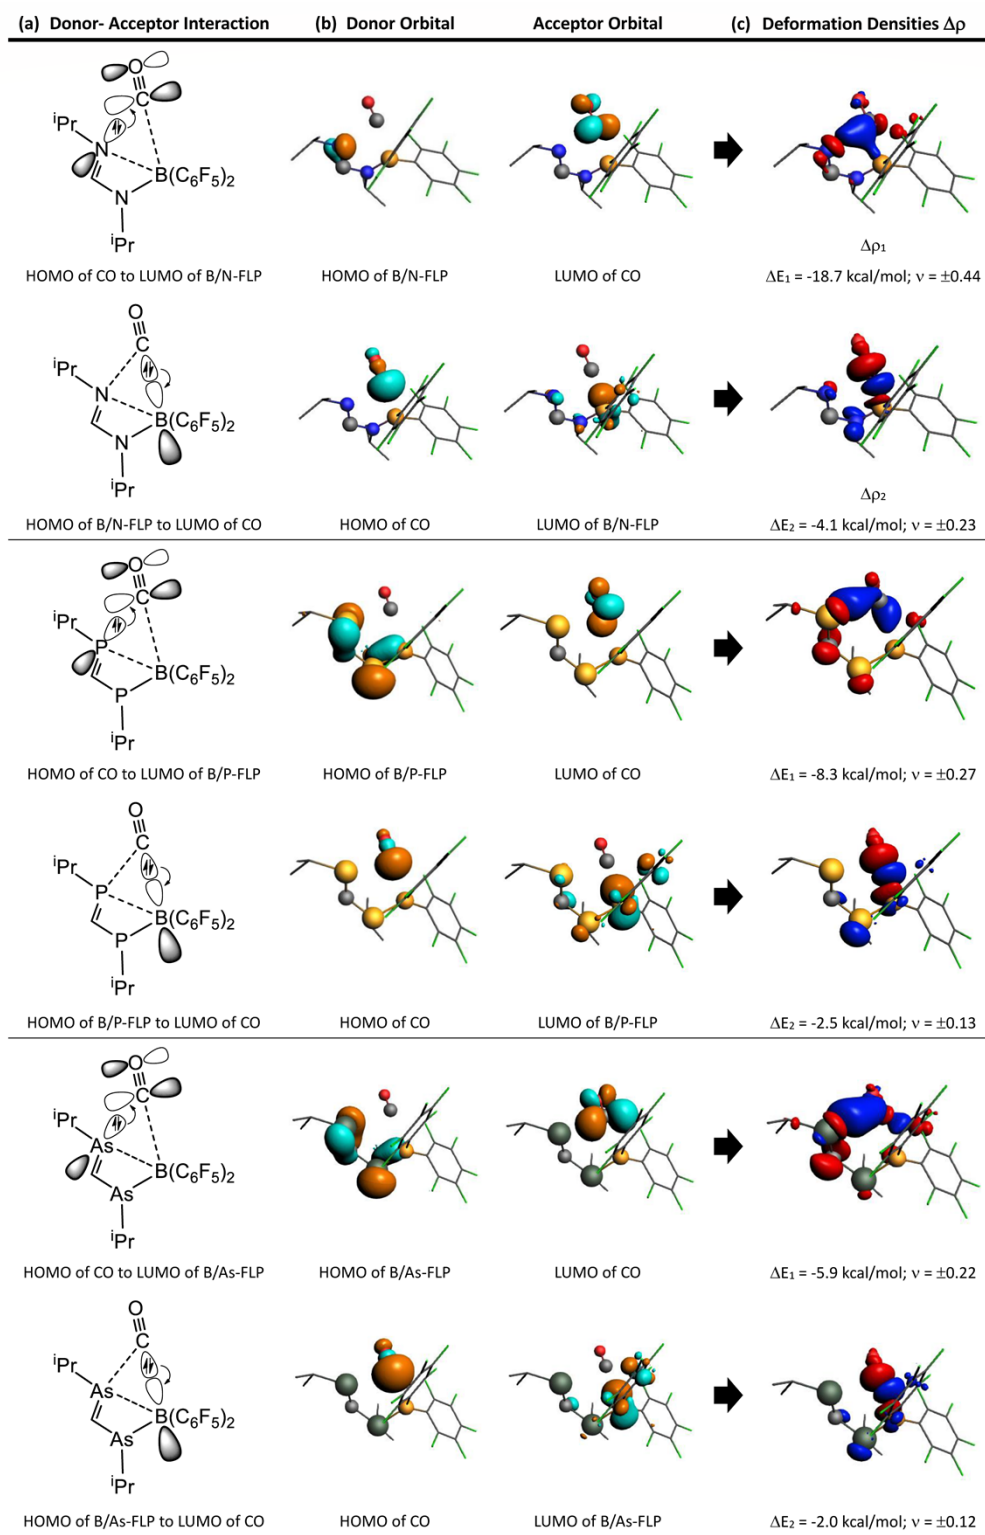

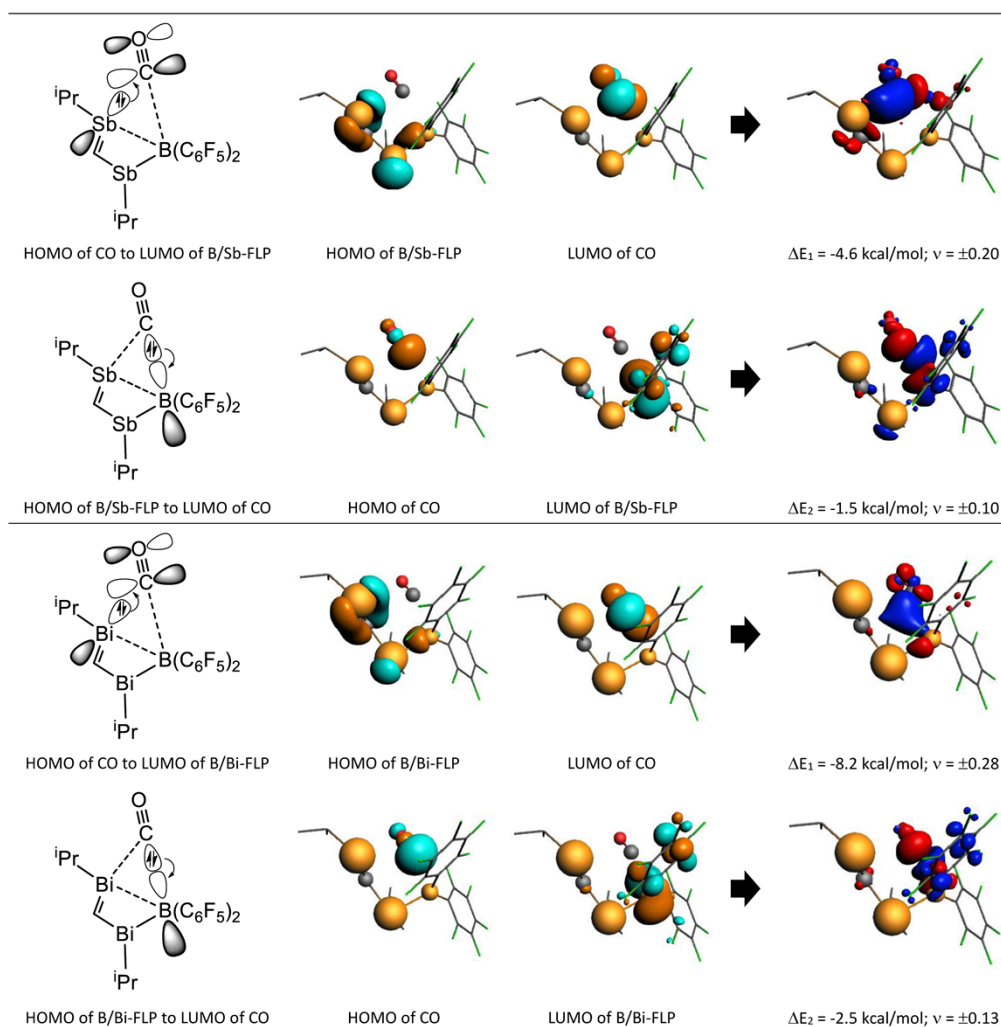

**Figure S2.** The analysis of **B/G15-TS** using EDA-NOCV involved the following components: (a) a qualitative illustration of the orbital interactions between **B/G15-Rea** and CO; (b) the shape of the most significant interaction between occupied and empty orbitals of **B/G15-Rea** and CO; (c) a plot indicating the deformation densities ( $\Delta\rho_{(1)}$  and  $\Delta\rho_{(2)}$ ) of the pairwise orbital interactions between the two fragments in their closed-shell state, along with the corresponding interaction energies (kcal/mol)  $\Delta E_{\text{Orb}(1)}$  and  $\Delta E_{\text{Orb}(2)}$ , respectively. The deformation densities show the direction of charge flow from red to blue.

Table S1  
M06-2X-D3/def2-TZVP  
**B/N-Rea**

| Atomic<br>Number | Coordinates (Angstroms) |             |             |
|------------------|-------------------------|-------------|-------------|
|                  | X                       | Y           | Z           |
| F                | 5.19235800              | 4.80212100  | 0.67866200  |
| F                | 3.24912800              | 5.00713800  | -1.13885400 |
| F                | 1.16146200              | 3.27627300  | -1.12223400 |
| F                | 1.03427300              | 1.31704500  | 0.75626400  |
| F                | 2.99464300              | 1.09961400  | 2.59956400  |
| F                | 5.30242500              | 0.22615500  | 4.54812200  |
| F                | 6.77065900              | -1.94591200 | 4.04411300  |
| F                | 8.40527900              | -2.03018500 | 1.88269500  |
| F                | 8.56322500              | 0.10781600  | 0.21237600  |
| F                | 7.08508900              | 2.31017400  | 0.71367800  |
| N                | 4.77833100              | 2.97375400  | 4.32458300  |
| N                | 6.18161800              | 3.98465000  | 3.17336500  |
| C                | 5.60783700              | 3.99976700  | 4.36191500  |
| C                | 3.68421100              | 2.62029100  | 5.21367600  |
| H                | 3.41178800              | 1.59193700  | 4.94493700  |
| C                | 2.47414200              | 3.52525000  | 4.98353400  |
| H                | 2.71783900              | 4.56853700  | 5.23919300  |
| H                | 1.62861300              | 3.20615900  | 5.60912000  |
| H                | 2.15704800              | 3.49358400  | 3.93177100  |
| C                | 4.15094000              | 2.63567100  | 6.66529300  |
| H                | 5.00660900              | 1.96008300  | 6.79817300  |
| H                | 3.33923000              | 2.30822200  | 7.32898400  |
| H                | 4.44522000              | 3.64965900  | 6.97960100  |
| C                | 8.63911300              | 4.05431700  | 3.24124300  |
| H                | 8.68027200              | 4.15498600  | 4.33728300  |
| H                | 9.52571200              | 4.54623900  | 2.81690100  |
| H                | 8.68469300              | 2.98504900  | 2.99158000  |
| C                | 7.36020700              | 4.68615300  | 2.69239400  |
| H                | 7.34624200              | 4.56418300  | 1.60216900  |
| C                | 7.26385700              | 6.17326400  | 3.01541900  |

|   |            |             |             |
|---|------------|-------------|-------------|
| H | 6.34484100 | 6.59733000  | 2.58896600  |
| H | 8.12539900 | 6.70992200  | 2.59552600  |
| H | 7.26534400 | 6.34684300  | 4.10327100  |
| C | 4.16347200 | 2.93735400  | 1.71686100  |
| C | 3.07734000 | 2.06794600  | 1.68220300  |
| C | 2.05452700 | 2.15964600  | 0.74488500  |
| C | 2.11892000 | 3.16484300  | -0.21846700 |
| C | 3.18971800 | 4.05303500  | -0.22353600 |
| C | 4.19142400 | 3.92417200  | 0.73880300  |
| C | 6.14258800 | 1.35883100  | 2.64459800  |
| C | 6.08937700 | 0.24407500  | 3.47262200  |
| C | 6.84457100 | -0.90385500 | 3.23154100  |
| C | 7.68261700 | -0.95019300 | 2.12186400  |
| C | 7.76268100 | 0.14631700  | 1.26530700  |
| C | 6.98978100 | 1.26778400  | 1.54434600  |
| B | 5.29177700 | 2.71436900  | 2.84826300  |
| H | 5.78031200 | 4.70226900  | 5.18909300  |

Table S2

M06-2X-D3/def2-TZVP

**Al/N-Rea**

| Atomic<br>Number | Coordinates (Angstroms) |             |             |
|------------------|-------------------------|-------------|-------------|
|                  | X                       | Y           | Z           |
| Al               | -0.00005200             | -0.58292800 | -0.00007700 |
| N                | -0.14345600             | -2.14762200 | 1.09439900  |
| N                | 0.14337200              | -2.14713700 | -1.09525400 |
| C                | 1.67052500              | 0.45692400  | 0.13420100  |
| C                | -1.67060700             | 0.45701200  | -0.13394100 |
| C                | 1.95737500              | 1.17099500  | 1.28865500  |
| C                | 2.61421100              | 0.51523100  | -0.88113200 |
| C                | -1.95714700             | 1.17192100  | -1.28795400 |
| C                | -2.61454500             | 0.51460800  | 0.88119900  |
| C                | 3.12008400              | 1.91835700  | 1.45094000  |
| F                | 1.08545300              | 1.14448700  | 2.30318900  |
| C                | 3.79443900              | 1.24697400  | -0.77276800 |



|   |             |             |             |
|---|-------------|-------------|-------------|
| F | 2.40528000  | -0.14654800 | -2.02465700 |
| C | -0.39842000 | -2.67994200 | 2.42686300  |
| C | -0.00002100 | -2.87867300 | -0.00058700 |
| C | 0.39838100  | -2.67885400 | -2.42795000 |
| C | -3.11979500 | 1.91942400  | -1.44999700 |
| F | -1.08496400 | 1.14611500  | -2.30228100 |
| C | -3.79473100 | 1.24645400  | 0.77305900  |
| F | -2.40591100 | -0.14798500 | 2.02430500  |
| C | 4.04163300  | 1.95003300  | 0.40501500  |
| F | 3.36542200  | 2.58618700  | 2.56635100  |
| F | 4.67654200  | 1.28367100  | -1.75866500 |
| C | 0.73181800  | -3.59901000 | 2.88655900  |
| C | -1.76248100 | -3.36389200 | 2.49850000  |
| H | -0.42228900 | -1.80317900 | 3.09028600  |
| H | 0.00000900  | -3.98152700 | -0.00082700 |
| C | -0.73163500 | -3.59804700 | -2.88794300 |
| C | 1.76262300  | -3.36240500 | -2.49995600 |
| H | 0.42196600  | -1.80182100 | -3.09102700 |
| C | -4.04161000 | 1.95036400  | -0.40428100 |
| F | -3.36484100 | 2.58807400  | -2.56498100 |
| F | -4.67708600 | 1.28246900  | 1.75875800  |
| F | 5.15461000  | 2.64936500  | 0.53153700  |
| H | 0.57096800  | -3.91826600 | 3.92564300  |
| H | 0.78172900  | -4.50611800 | 2.26371700  |
| H | 1.70004100  | -3.08348100 | 2.82498000  |
| H | -1.97379800 | -3.70140600 | 3.52293100  |
| H | -1.79190300 | -4.24624700 | 1.83952200  |
| H | -2.55288900 | -2.66713800 | 2.19037500  |
| H | -0.57077000 | -3.91682100 | -3.92717200 |
| H | -0.78124200 | -4.50543500 | -2.26548600 |
| H | -1.69999900 | -3.08281700 | -2.82607800 |
| H | 1.97395400  | -3.69946600 | -3.52453300 |
| H | 1.79233400  | -4.24500100 | -1.84131500 |
| H | 2.55286400  | -2.66555100 | -2.19162500 |
| F | -5.15453900 | 2.64981200  | -0.53058800 |

-----  
Table S3

M06-2X-D3/def2-TZVP

**Ga/N-Rea**

| Atomic<br>Number | Coordinates (Angstroms) |             |             |
|------------------|-------------------------|-------------|-------------|
|                  | X                       | Y           | Z           |
| Ga               | -0.00000500             | 0.48077500  | 0.00001300  |
| N                | -0.14759600             | 2.14393600  | -1.09437700 |
| N                | 0.14759200              | 2.14389500  | 1.09446800  |
| C                | 1.70820200              | -0.53600100 | -0.14165000 |
| C                | -1.70821100             | -0.53600900 | 0.14163100  |
| C                | 1.99579800              | -1.26941300 | -1.28294300 |
| C                | 2.66037600              | -0.54361500 | 0.86661600  |
| C                | -1.99578000             | -1.26951700 | 1.28286900  |
| C                | -2.66041100             | -0.54353600 | -0.86661200 |
| C                | 3.17726300              | -1.98890900 | -1.43849500 |
| F                | 1.11295900              | -1.29016600 | -2.28580600 |
| C                | 3.85777700              | -1.24737100 | 0.76028300  |
| F                | 2.44428400              | 0.13901100  | 1.99490900  |
| C                | -0.42466400             | 2.67607000  | -2.42168500 |
| C                | 0.00000200              | 2.87006900  | 0.00005800  |
| C                | 0.42467400              | 2.67598100  | 2.42179200  |
| C                | -3.17724400             | -1.98902400 | 1.43839000  |
| F                | -1.11291700             | -1.29035800 | 2.28570800  |
| C                | -3.85781100             | -1.24729800 | -0.76030800 |
| F                | -2.44434700             | 0.13918300  | -1.99485300 |
| C                | 4.11043600              | -1.97238300 | -0.40283900 |
| F                | 3.42705700              | -2.67697800 | -2.54014900 |
| F                | 4.75011100              | -1.23767800 | 1.73702300  |
| C                | 0.69569800              | 3.59868600  | -2.89950300 |
| C                | -1.79129400             | 3.35749000  | -2.47468300 |
| H                | -0.45680900             | 1.80063500  | -3.08694800 |
| H                | 0.00000700              | 3.97259300  | 0.00007800  |
| C                | -0.69565500             | 3.59862500  | 2.89963300  |
| C                | 1.79132900              | 3.35735000  | 2.47481400  |
| H                | 0.45678500              | 1.80052600  | 3.08703000  |
| C                | -4.11044200             | -1.97240900 | 0.40275900  |
| F                | -3.42701100             | -2.67718400 | 2.53999300  |

|   |             |             |             |
|---|-------------|-------------|-------------|
| F | -4.75016900 | -1.23752000 | -1.73702500 |
| F | 5.23945800  | -2.64587800 | -0.52525200 |
| H | 0.51845300  | 3.91815800  | -3.93600200 |
| H | 0.75236500  | 4.50520900  | -2.27648000 |
| H | 1.66630100  | 3.08616500  | -2.85217100 |
| H | -2.01963600 | 3.69249100  | -3.49642500 |
| H | -1.81200100 | 4.24089600  | -1.81690500 |
| H | -2.57570000 | 2.66038700  | -2.15219600 |
| H | -0.51840200 | 3.91805900  | 3.93614200  |
| H | -0.75228600 | 4.50516900  | 2.27663700  |
| H | -1.66627700 | 3.08614200  | 2.85228200  |
| H | 2.01968100  | 3.69231500  | 3.49656500  |
| H | 1.81207000  | 4.24077200  | 1.81705800  |
| H | 2.57571000  | 2.66022600  | 2.15230900  |
| F | -5.23946300 | -2.64591000 | 0.52514300  |

Table S4

M06-2X-D3/def2-TZVP

**In/N-Rea**

| Atomic<br>Number | Coordinates (Angstroms) |             |             |
|------------------|-------------------------|-------------|-------------|
|                  | X                       | Y           | Z           |
| F                | 4.91088100              | 4.74295700  | 0.20931200  |
| F                | 2.93096500              | 5.35221300  | -1.53022300 |
| F                | 0.66659500              | 3.86895500  | -1.57102000 |
| F                | 0.36667900              | 1.77348300  | 0.12043000  |
| F                | 2.34936100              | 1.15849400  | 1.86417200  |
| F                | 5.42390100              | -0.25586400 | 4.36935400  |
| F                | 6.99082600              | -2.45815300 | 4.26211200  |
| F                | 8.82042600              | -2.71716600 | 2.28293700  |
| F                | 9.09521500              | -0.78392400 | 0.40506700  |
| F                | 7.52622700              | 1.42476500  | 0.50857400  |
| N                | 4.79414700              | 3.13293700  | 4.60239200  |
| N                | 6.28491000              | 4.22643000  | 3.34528800  |
| C                | 5.65347200              | 4.12924800  | 4.50012000  |
| C                | 3.95391400              | 2.81324700  | 5.74285200  |

|    |            |             |             |
|----|------------|-------------|-------------|
| H  | 4.26805300 | 1.82183700  | 6.11461300  |
| C  | 2.50672700 | 2.69547600  | 5.26882300  |
| H  | 2.14591400 | 3.67347800  | 4.91468700  |
| H  | 1.85017700 | 2.34992700  | 6.07984000  |
| H  | 2.42804900 | 1.98095800  | 4.43579900  |
| C  | 4.08267600 | 3.80838900  | 6.89077300  |
| H  | 5.11201300 | 3.85995700  | 7.27411900  |
| H  | 3.43190700 | 3.50289800  | 7.72114100  |
| H  | 3.77421200 | 4.81679900  | 6.57303400  |
| C  | 8.52676900 | 4.46858900  | 2.45953100  |
| H  | 8.98356300 | 3.88295800  | 3.27220700  |
| H  | 9.27478400 | 5.17300600  | 2.06903500  |
| H  | 8.25413800 | 3.77428800  | 1.65066600  |
| C  | 7.29250600 | 5.20496900  | 2.97666300  |
| H  | 6.88170600 | 5.80071500  | 2.14233400  |
| C  | 7.65133700 | 6.16351600  | 4.10676000  |
| H  | 6.77768300 | 6.73598400  | 4.45049700  |
| H  | 8.40549500 | 6.88191400  | 3.75823300  |
| H  | 8.07523200 | 5.61854800  | 4.96486500  |
| C  | 3.68340500 | 2.93205200  | 1.08344800  |
| C  | 2.51169400 | 2.19496500  | 1.03352900  |
| C  | 1.47830100 | 2.48958200  | 0.14832000  |
| C  | 1.63150800 | 3.56841900  | -0.72153300 |
| C  | 2.79805000 | 4.33143000  | -0.69950700 |
| C  | 3.80262900 | 3.99800400  | 0.20628600  |
| C  | 6.43269000 | 0.64431200  | 2.44009900  |
| C  | 6.32018800 | -0.36283700 | 3.38514600  |
| C  | 7.11423100 | -1.50690600 | 3.35108800  |
| C  | 8.05658400 | -1.64148200 | 2.33269200  |
| C  | 8.19672300 | -0.64659400 | 1.36595300  |
| C  | 7.37843600 | 0.47723900  | 1.44183300  |
| In | 5.22972800 | 2.45849300  | 2.54414100  |
| H  | 5.83211900 | 4.83417400  | 5.32518700  |

Table S5

M06-2X-D3/def2-TZVP

TI/N-Rea

| Atomic<br>Number | Coordinates (Angstroms) |             |             |
|------------------|-------------------------|-------------|-------------|
|                  | X                       | Y           | Z           |
| Tl               | 0.00000700              | -0.09399600 | 0.00001900  |
| N                | 0.18126000              | -2.11737900 | 1.11091400  |
| N                | -0.18120800             | -2.11741200 | -1.11081700 |
| C                | 2.00884900              | 0.76969400  | -0.12335600 |
| C                | -2.00882500             | 0.76972000  | 0.12333200  |
| C                | 2.93711900              | 0.55185700  | 0.88190300  |
| C                | 2.40502900              | 1.50463900  | -1.22821700 |
| C                | -2.93712600             | 0.55172900  | -0.88186700 |
| C                | -2.40496600             | 1.50484600  | 1.22808600  |
| C                | 4.23719200              | 1.04541500  | 0.79990600  |
| F                | 2.60015900              | -0.14312700 | 1.96890500  |
| C                | 3.69504700              | 2.01589800  | -1.34828200 |
| F                | 1.54211300              | 1.73360400  | -2.21836400 |
| C                | 0.51736900              | -2.73651300 | 2.38465400  |
| C                | 0.00000600              | -2.80138500 | 0.00006100  |
| C                | -0.51744100             | -2.73655400 | -2.38452100 |
| C                | -4.23718800             | 1.04532300  | -0.79991600 |
| F                | -2.60020700             | -0.14345300 | -1.96875500 |
| C                | -3.69497100             | 2.01614900  | 1.34810000  |
| F                | -1.54201900             | 1.73395700  | 2.21817300  |
| C                | 4.61059400              | 1.78142600  | -0.32344900 |
| F                | 5.11344700              | 0.82957600  | 1.76607100  |
| F                | 4.06024700              | 2.71429700  | -2.40961900 |
| C                | 1.88722900              | -3.41498800 | 2.34030700  |
| C                | -0.57681000             | -3.69380300 | 2.85934800  |
| H                | 0.58016500              | -1.91090200 | 3.11014200  |
| H                | -0.00003700             | -3.90650400 | 0.00008300  |
| C                | -1.88738400             | -3.41485300 | -2.34009000 |
| C                | 0.57660000              | -3.69399800 | -2.85922500 |
| H                | -0.58015900             | -1.91096400 | -3.11004000 |
| C                | -4.61054700             | 1.78152700  | 0.32332600  |
| F                | -5.11347400             | 0.82933900  | -1.76602100 |
| F                | -4.06013300             | 2.71472900  | 2.40933100  |
| F                | 5.83719500              | 2.25848400  | -0.41763900 |

|   |             |             |             |
|---|-------------|-------------|-------------|
| H | 2.16317300  | -3.80783500 | 3.32962500  |
| H | 1.88177800  | -4.25771100 | 1.63103400  |
| H | 2.65506400  | -2.69695400 | 2.02279700  |
| H | -0.35480800 | -4.07071500 | 3.86798700  |
| H | -0.65761000 | -4.56352900 | 2.18862800  |
| H | -1.55089400 | -3.18591200 | 2.88119900  |
| H | -2.16341700 | -3.80771600 | -3.32937700 |
| H | -1.88201000 | -4.25753700 | -1.63077100 |
| H | -2.65511700 | -2.69670500 | -2.02258800 |
| H | 0.35452000  | -4.07089600 | -3.86785200 |
| H | 0.65730100  | -4.56372600 | -2.18849500 |
| H | 1.55075000  | -3.18623500 | -2.88111000 |
| F | -5.83713500 | 2.25862900  | 0.41746300  |

Table S6

M06-2X-D3/def2-TZVP

**B/P-Rea**

| Atomic<br>Number | Coordinates (Angstroms) |             |             |
|------------------|-------------------------|-------------|-------------|
|                  | X                       | Y           | Z           |
| B                | 0.00000000              | 0.00000000  | 0.48070400  |
| P                | -1.15657800             | 0.59766100  | 1.99858400  |
| P                | 1.15657800              | -0.59766100 | 1.99858400  |
| C                | 0.56058000              | 1.22208200  | -0.40355800 |
| C                | -0.56058000             | -1.22208200 | -0.40355800 |
| C                | 1.90427800              | 1.51982500  | -0.62188000 |
| C                | -0.36215500             | 2.06151100  | -1.02677300 |
| C                | 0.36215500              | -2.06151100 | -1.02677300 |
| C                | -1.90427800             | -1.51982500 | -0.62188000 |
| C                | 2.31015300              | 2.60877100  | -1.39458800 |
| F                | 2.86805300              | 0.76567700  | -0.10477200 |
| C                | 0.00000000              | 3.15772300  | -1.80051700 |
| F                | -1.66735400             | 1.82394800  | -0.86594500 |
| C                | -1.57517500             | 2.39296700  | 2.28131000  |
| C                | 0.00000000              | 0.00000000  | 3.13714400  |
| C                | 1.57517500              | -2.39296700 | 2.28131000  |

|   |             |             |             |
|---|-------------|-------------|-------------|
| C | 0.00000000  | -3.15772300 | -1.80051700 |
| F | 1.66735400  | -1.82394800 | -0.86594500 |
| C | -2.31015300 | -2.60877100 | -1.39458800 |
| F | -2.86805300 | -0.76567700 | -0.10477200 |
| C | 1.35417600  | 3.43201900  | -1.98099800 |
| F | 3.59545200  | 2.86280800  | -1.57746000 |
| F | -0.91444100 | 3.93372400  | -2.35891600 |
| C | -2.45611900 | 2.52134000  | 3.52494300  |
| C | -0.32777200 | 3.27204900  | 2.37481500  |
| H | -2.16018100 | 2.66710700  | 1.38875900  |
| H | 0.00000000  | 0.00000000  | 4.22983100  |
| C | 0.32777200  | -3.27204900 | 2.37481500  |
| C | 2.45611900  | -2.52134000 | 3.52494300  |
| H | 2.16018100  | -2.66710700 | 1.38875900  |
| C | -1.35417600 | -3.43201900 | -1.98099800 |
| F | 0.91444100  | -3.93372400 | -2.35891600 |
| F | -3.59545200 | -2.86280800 | -1.57746000 |
| F | 1.72844700  | 4.46617300  | -2.71248900 |
| H | -2.73544800 | 3.57374900  | 3.68236000  |
| H | -1.91503700 | 2.18479600  | 4.42333200  |
| H | -3.37785700 | 1.93004200  | 3.43773600  |
| H | -0.61866300 | 4.33018400  | 2.46402700  |
| H | 0.26429500  | 3.00364700  | 3.26285000  |
| H | 0.32178100  | 3.17080100  | 1.49379000  |
| H | -0.32178100 | -3.17080100 | 1.49379000  |
| H | -0.26429500 | -3.00364700 | 3.26285000  |
| H | 0.61866300  | -4.33018400 | 2.46402700  |
| H | 3.37785700  | -1.93004200 | 3.43773600  |
| H | 1.91503700  | -2.18479600 | 4.42333200  |
| H | 2.73544800  | -3.57374900 | 3.68236000  |
| F | -1.72844700 | -4.46617300 | -2.71248900 |

Table S7

M06-2X-D3/def2-TZVP

**B/As-Rea**

Atomic Coordinates (Angstroms)

| Number | X           | Y           | Z           |
|--------|-------------|-------------|-------------|
| C      | -0.00005800 | -3.08365800 | -0.00114900 |
| As     | -0.52499600 | -1.88919600 | -1.30881700 |
| B      | 0.00001700  | -0.29242200 | -0.00002100 |
| As     | 0.52508500  | -1.89025100 | 1.30744900  |
| C      | 1.29447600  | 0.57999600  | -0.36666200 |
| C      | -1.29454100 | 0.57959100  | 0.36726400  |
| C      | 1.88505000  | 1.29206500  | 0.67761400  |
| C      | 1.92921200  | 0.67369000  | -1.60352800 |
| C      | -1.88489400 | 1.29277300  | -0.67638200 |
| C      | -1.92956200 | 0.67196600  | 1.60408200  |
| C      | 3.06503400  | 2.01332100  | 0.54504300  |
| F      | 1.32582500  | 1.24668500  | 1.89016300  |
| C      | 3.10545800  | 1.40240400  | -1.78379400 |
| F      | 1.43961100  | 0.06195800  | -2.67585700 |
| C      | -2.43354900 | -2.23799500 | -1.78003500 |
| C      | 2.43373800  | -2.23961800 | 1.77789800  |
| C      | -3.06488800 | 2.01391800  | -0.54329300 |
| F      | -1.32543900 | 1.24865600  | -1.88886800 |
| C      | -3.10583300 | 1.40051500  | 1.78487600  |
| F      | -1.44022000 | 0.05908500  | 2.67587300  |
| C      | 3.67994800  | 2.06681800  | -0.70416300 |
| F      | 3.60484700  | 2.63191200  | 1.58232700  |
| F      | 3.68082400  | 1.46643900  | -2.97305800 |
| C      | -3.36541800 | -2.07186100 | -0.58104400 |
| C      | -2.86615400 | -1.39240200 | -2.97510100 |
| H      | -2.40685100 | -3.30065300 | -2.07311200 |
| H      | -0.00013100 | -4.17633300 | -0.00155900 |
| C      | 3.36532300  | -2.07250800 | 0.57882400  |
| C      | 2.86677700  | -1.39516800 | 2.97361200  |
| H      | 2.40698600  | -3.30253800 | 2.07001800  |
| C      | -3.68007000 | 2.06610400  | 0.70583500  |
| F      | -3.60444900 | 2.63364700  | -1.58003100 |
| F      | -3.68143000 | 1.46329400  | 2.97409300  |
| F      | 4.79782800  | 2.75123700  | -0.86495700 |
| H      | -4.37495200 | -2.42613100 | -0.84386200 |
| H      | -3.45319100 | -1.01443300 | -0.28913900 |



|   |             |             |             |
|---|-------------|-------------|-------------|
| H | -3.01873600 | -2.64020600 | 0.29366600  |
| H | -2.85844900 | -0.32026500 | -2.73059600 |
| H | -3.89191300 | -1.65995400 | -3.27131100 |
| H | -2.21048900 | -1.54184200 | -3.84446000 |
| H | 4.37489900  | -2.42706500 | 0.84109000  |
| H | 3.45308600  | -1.01483000 | 0.28782100  |
| H | 3.01839400  | -2.64007500 | -0.29629300 |
| H | 2.85930700  | -0.32282300 | 2.73002500  |
| H | 3.89252800  | -1.66323800 | 3.26938600  |
| H | 2.21124800  | -1.54519500 | 3.84297300  |
| F | -4.79795900 | 2.75039400  | 0.86711600  |

Table S8

M06-2X-D3/def2-TZVP

**B/Sb-Rea**

| Atomic<br>Number | Coordinates (Angstroms) |             |             |
|------------------|-------------------------|-------------|-------------|
|                  | X                       | Y           | Z           |
| C                | 0.08123300              | 3.02763000  | -0.50616500 |
| Sb               | 0.66585000              | 1.44227000  | -1.64335100 |
| B                | -0.03362400             | 0.03069600  | 0.09955000  |
| Sb               | -0.70709400             | 2.00244200  | 1.14185000  |
| C                | -1.27901900             | -0.92989400 | -0.20712500 |
| C                | 1.27822400              | -0.71469000 | 0.64977900  |
| C                | -2.05688300             | -1.32903300 | 0.88062700  |
| C                | -1.71072600             | -1.38052200 | -1.45433900 |
| C                | 1.91771100              | -1.60999200 | -0.21186100 |
| C                | 1.89454100              | -0.53031300 | 1.88779200  |
| C                | -3.22446700             | -2.07249100 | 0.76215900  |
| F                | -1.70625700             | -0.93611200 | 2.10987100  |
| C                | -2.86711200             | -2.14405200 | -1.61588200 |
| F                | -1.03837900             | -1.08668900 | -2.56384700 |
| C                | 2.81830400              | 1.58732300  | -2.10673300 |
| C                | -2.88957000             | 2.31968600  | 0.98389300  |
| C                | 3.11479100              | -2.24805200 | 0.08737300  |
| F                | 1.39992100              | -1.82632300 | -1.42390100 |

|   |             |             |             |
|---|-------------|-------------|-------------|
| C | 3.08539000  | -1.16801500 | 2.23703300  |
| F | 1.36946200  | 0.27978800  | 2.80128700  |
| C | -3.63169400 | -2.48529000 | -0.50429600 |
| F | -3.94781000 | -2.37359900 | 1.82811600  |
| F | -3.24371000 | -2.54603000 | -2.81832700 |
| C | 3.63848800  | 1.67763800  | -0.82139300 |
| C | 3.25613500  | 0.42584500  | -2.99481100 |
| H | 2.90035900  | 2.53456200  | -2.66327600 |
| H | 0.18787800  | 4.10335600  | -0.67324700 |
| C | -3.44696300 | 1.85864400  | -0.35922600 |
| C | -3.62920000 | 1.69308800  | 2.16307400  |
| H | -2.96449400 | 3.41754100  | 1.04809500  |
| C | 3.70263000  | -2.02466700 | 1.33048600  |
| F | 3.69884300  | -3.04190900 | -0.79501500 |
| F | 3.63360800  | -0.96329600 | 3.42275900  |
| F | -4.73265200 | -3.20002300 | -0.64891400 |
| H | 4.70308400  | 1.82821500  | -1.06624300 |
| H | 3.56807400  | 0.74734400  | -0.23525200 |
| H | 3.31556000  | 2.50911500  | -0.17917900 |
| H | 3.12870400  | -0.54276500 | -2.48769100 |
| H | 4.32389000  | 0.52563700  | -3.24769700 |
| H | 2.69174600  | 0.38392400  | -3.93761600 |
| H | -4.50094100 | 2.16888000  | -0.45581800 |
| H | -3.42290800 | 0.76136100  | -0.44776300 |
| H | -2.89202000 | 2.28162300  | -1.20964000 |
| H | -3.53996400 | 0.59624200  | 2.16384500  |
| H | -4.70326800 | 1.93332300  | 2.10662800  |
| H | -3.25564200 | 2.05730400  | 3.13118900  |
| F | 4.83592900  | -2.62319300 | 1.64687800  |

Table S9

M06-2X-D3/def2-TZVP

**B/Bi-Rea**

| Atomic<br>Number | Coordinates (Angstroms) |   |   |
|------------------|-------------------------|---|---|
|                  | X                       | Y | Z |

|    |             |             |             |
|----|-------------|-------------|-------------|
| B  | -0.00455900 | 0.40957300  | -0.00200700 |
| Bi | -0.67274600 | -1.37566000 | -1.53773600 |
| Bi | 0.68445200  | -1.37319200 | 1.53117100  |
| C  | -1.20691900 | 1.27878900  | 0.59639200  |
| C  | 1.19297100  | 1.28914400  | -0.59558400 |
| C  | -1.07161700 | 1.89709700  | 1.84061200  |
| C  | -2.40605700 | 1.52361000  | -0.07040900 |
| C  | 2.38959900  | 1.54192800  | 0.07264900  |
| C  | 1.05443500  | 1.90795900  | -1.83928500 |
| C  | -2.06908500 | 2.67630900  | 2.41756000  |
| F  | 0.06007300  | 1.73983500  | 2.52944500  |
| C  | -3.43128700 | 2.29659200  | 0.46869600  |
| F  | -2.62251300 | 1.00306600  | -1.28189100 |
| C  | -2.88904700 | -1.99559600 | -1.69961600 |
| C  | 0.01736200  | -2.74321000 | -0.00508600 |
| C  | 2.90507100  | -1.97329700 | 1.71205500  |
| C  | 3.40996400  | 2.32237200  | -0.46489900 |
| F  | 2.60859200  | 1.02215400  | 1.28408200  |
| C  | 2.04690700  | 2.69481200  | -2.41448000 |
| F  | -0.07552400 | 1.74354700  | -2.52931900 |
| C  | -3.25918000 | 2.87680000  | 1.72164000  |
| F  | -1.89873200 | 3.22938400  | 3.60644400  |
| F  | -4.55887900 | 2.48139100  | -0.19731700 |
| C  | -2.94031900 | -3.41100500 | -2.25404800 |
| C  | -3.58731300 | -1.87001300 | -0.35455000 |
| H  | -3.31083300 | -1.27713800 | -2.41746900 |
| H  | 0.03381000  | -3.84037600 | -0.01095600 |
| C  | 3.61353900  | -1.83896100 | 0.37317000  |
| C  | 2.96353600  | -3.38934600 | 2.26412800  |
| H  | 3.31418200  | -1.25256900 | 2.43494800  |
| C  | 3.23502800  | 2.90265400  | -1.71740100 |
| F  | 4.53589300  | 2.51375300  | 0.20208100  |
| F  | 1.87380400  | 3.24815600  | -3.60281900 |
| F  | -4.21929900 | 3.61367300  | 2.24964100  |
| H  | -3.98584800 | -3.75210400 | -2.34296500 |
| H  | -2.42534700 | -4.11812800 | -1.58356200 |
| H  | -2.48109700 | -3.48904100 | -3.25040400 |
| H  | -4.64929500 | -2.15594000 | -0.45042200 |

|   |             |             |             |
|---|-------------|-------------|-------------|
| H | -3.12734800 | -2.53301900 | 0.39448400  |
| H | -3.56009700 | -0.84280500 | 0.03613300  |
| H | 3.58123900  | -0.81107300 | -0.01516400 |
| H | 3.16552600  | -2.50414000 | -0.38112200 |
| H | 4.67693800  | -2.11642400 | 0.47771200  |
| H | 2.49666000  | -3.47335100 | 3.25642300  |
| H | 2.46020200  | -4.09934000 | 1.58786600  |
| H | 4.01113200  | -3.72180300 | 2.36109100  |
| F | 4.19057000  | 3.64662600  | -2.24378600 |

Table S10

M06-2X-D3/def2-TZVP

CO

| Atomic<br>Number | Coordinates (Angstroms) |            |             |
|------------------|-------------------------|------------|-------------|
|                  | X                       | Y          | Z           |
| C                | 0.00000000              | 0.00000000 | -0.06194300 |
| O                | 0.00000000              | 0.00000000 | 1.06194300  |

Table S11

M06-2X-D3/def2-TZVP

**B/N-TS**

| Atomic<br>Number | Coordinates (Angstroms) |             |             |
|------------------|-------------------------|-------------|-------------|
|                  | X                       | Y           | Z           |
| F                | 1.12092300              | 0.86129900  | 2.27802800  |
| F                | 3.65404800              | 1.61582500  | 2.74592200  |
| F                | 5.61868700              | 0.92306700  | 1.00285600  |
| F                | 5.01324700              | -0.51507400 | -1.21635100 |
| F                | 2.50702000              | -1.25856200 | -1.70511800 |
| F                | -2.14656500             | 0.04521200  | 1.88987200  |
| F                | -3.64184700             | 2.23135200  | 1.79981700  |
| F                | -3.11164400             | 4.19669800  | -0.00211900 |
| F                | -1.05554500             | 3.89719600  | -1.75786900 |

|   |             |             |             |
|---|-------------|-------------|-------------|
| F | 0.43803600  | 1.67899400  | -1.71204700 |
| O | -0.27875300 | -1.25561000 | -3.12317800 |
| N | -2.31872400 | -1.58604200 | -0.65607900 |
| N | -0.37332600 | -1.81397100 | 0.59184500  |
| C | -0.07723300 | -0.95787600 | -2.05980700 |
| C | -1.69017800 | -2.15364700 | 0.28297500  |
| H | -2.11251900 | -2.94648200 | 0.92379700  |
| C | 0.41644000  | -2.91567400 | 1.17607900  |
| H | -0.33133500 | -3.56083400 | 1.66514700  |
| C | 1.39333700  | -2.48821200 | 2.27043400  |
| H | 2.34456200  | -2.12613000 | 1.85848900  |
| H | 1.62328100  | -3.35675300 | 2.90345300  |
| H | 0.95873900  | -1.70345100 | 2.90535000  |
| C | 1.09876400  | -3.74168700 | 0.08784500  |
| H | 0.36293000  | -4.11616700 | -0.63951400 |
| H | 1.62181200  | -4.60436300 | 0.52494000  |
| H | 1.83617200  | -3.13444500 | -0.45706300 |
| C | -3.73634200 | -1.81163100 | -0.88549600 |
| H | -3.83042600 | -2.06020900 | -1.95632700 |
| C | -4.45451100 | -0.47969300 | -0.65686600 |
| H | -4.38318300 | -0.19015800 | 0.40364500  |
| H | -5.51728800 | -0.55387400 | -0.92716100 |
| H | -3.98896700 | 0.31236400  | -1.26066000 |
| C | -4.37996100 | -2.93322200 | -0.07556300 |
| H | -3.86929600 | -3.89492300 | -0.23162100 |
| H | -5.42801700 | -3.05517800 | -0.38109400 |
| H | -4.37081400 | -2.70194900 | 1.00098500  |
| C | 1.69636200  | -0.20130800 | 0.25724200  |
| C | 2.05384600  | 0.54065700  | 1.38288000  |
| C | 3.36069300  | 0.92780000  | 1.65663800  |
| C | 4.37028700  | 0.56796300  | 0.76655000  |
| C | 4.05800600  | -0.17074600 | -0.37023600 |
| C | 2.73417100  | -0.53966200 | -0.60378500 |
| C | -0.79760400 | 0.74759800  | 0.07195100  |
| C | -1.84004900 | 0.95893700  | 0.97299900  |
| C | -2.63182100 | 2.10194300  | 0.95399900  |
| C | -2.36942400 | 3.10490100  | 0.02487600  |
| C | -1.31998600 | 2.94853800  | -0.87474600 |

|   |             |             |             |
|---|-------------|-------------|-------------|
| C | -0.55598700 | 1.78477300  | -0.82586700 |
| B | 0.14010000  | -0.55577000 | 0.10071600  |

---

Table S12

M06-2X-D3/def2-TZVP

AI/N-TS

---

| Atomic<br>Number | Coordinates (Angstroms) |             |             |
|------------------|-------------------------|-------------|-------------|
|                  | X                       | Y           | Z           |
| F                | -0.99137700             | 2.37241600  | -0.81429500 |
| F                | -3.32123300             | 3.72193000  | -0.64613000 |
| F                | -5.58339600             | 2.42395700  | 0.07887900  |
| F                | -5.52507000             | -0.22598300 | 0.64623100  |
| F                | -3.18662300             | -1.57842100 | 0.49150500  |
| F                | 2.63210600              | -0.81816500 | -1.49529100 |
| F                | 4.86026500              | 0.50969600  | -0.86038900 |
| F                | 4.79930100              | 2.46309800  | 1.02242500  |
| F                | 2.48424400              | 3.04434300  | 2.31148900  |
| F                | 0.24307700              | 1.65638100  | 1.73222600  |
| O                | -0.29935500             | -2.32252400 | 2.55885400  |
| N                | 1.12893800              | -2.96449500 | 0.21546200  |
| N                | -0.18502700             | -2.03748300 | -1.42085100 |
| C                | -0.25871200             | -1.85531700 | 1.53036800  |
| C                | 0.69528300              | -2.96234700 | -0.99841400 |
| H                | 1.05656400              | -3.70484900 | -1.73691800 |
| C                | -0.68926100             | -2.05206800 | -2.79199900 |
| H                | -0.18504600             | -2.88047400 | -3.31986000 |
| C                | -0.32114300             | -0.74277200 | -3.48856800 |
| H                | -0.80069100             | 0.11075000  | -2.97743400 |
| H                | -0.66418400             | -0.73411100 | -4.53253600 |
| H                | 0.76663400              | -0.58941700 | -3.46887300 |
| C                | -2.19410400             | -2.30674100 | -2.82122100 |
| H                | -2.44178500             | -3.23935300 | -2.29628000 |
| H                | -2.55961200             | -2.37507500 | -3.85582000 |
| H                | -2.72945300             | -1.48273200 | -2.32468800 |
| C                | 2.20478900              | -3.85515900 | 0.61475700  |

|    |             |             |             |
|----|-------------|-------------|-------------|
| H  | 2.43711500  | -4.53325100 | -0.23081100 |
| C  | 1.78956300  | -4.70786500 | 1.81124900  |
| H  | 1.60721600  | -4.07794500 | 2.69356200  |
| H  | 2.58303100  | -5.42551400 | 2.06309700  |
| H  | 0.86973400  | -5.26779000 | 1.59138200  |
| C  | 3.45157700  | -3.02573800 | 0.92079000  |
| H  | 3.75500500  | -2.44366300 | 0.03926500  |
| H  | 4.28955800  | -3.66843800 | 1.22673000  |
| H  | 3.23789200  | -2.32092000 | 1.73997700  |
| C  | -2.01102000 | 0.35278200  | -0.15857800 |
| C  | -2.08723600 | 1.71125500  | -0.44001900 |
| C  | -3.27790100 | 2.43013200  | -0.36693500 |
| C  | -4.44352800 | 1.76295000  | 0.00612500  |
| C  | -4.41335600 | 0.39962800  | 0.29616600  |
| C  | -3.19662400 | -0.26989900 | 0.20959500  |
| C  | 1.34455300  | 0.37052800  | 0.09891900  |
| C  | 2.54968600  | 0.11963000  | -0.54590900 |
| C  | 3.72569100  | 0.80057400  | -0.24343500 |
| C  | 3.69675300  | 1.80043300  | 0.72632700  |
| C  | 2.50680400  | 2.09823400  | 1.38779000  |
| C  | 1.36405900  | 1.37472700  | 1.05925800  |
| Al | -0.31850600 | -0.65414800 | -0.19509000 |

Table S13

M06-2X-D3/def2-TZVP

**Ga/N-TS**

| Atomic<br>Number | Coordinates (Angstroms) |             |             |
|------------------|-------------------------|-------------|-------------|
|                  | X                       | Y           | Z           |
| F                | -1.02941000             | 2.42078300  | -0.77037700 |
| F                | -3.36626700             | 3.76675300  | -0.62804500 |
| F                | -5.64009000             | 2.45465300  | 0.03341500  |
| F                | -5.58794300             | -0.20237600 | 0.56234700  |
| F                | -3.24534800             | -1.55070800 | 0.43273200  |
| F                | 2.62167400              | -0.79061600 | -1.48450500 |
| F                | 4.87333300              | 0.48765300  | -0.82146400 |

|   |             |             |             |
|---|-------------|-------------|-------------|
| F | 4.83699100  | 2.42677900  | 1.07605400  |
| F | 2.52487300  | 3.04421000  | 2.35277100  |
| F | 0.25848900  | 1.70359200  | 1.74553800  |
| O | -0.27735800 | -2.33745900 | 2.58528400  |
| N | 1.16502400  | -2.96485000 | 0.21417200  |
| N | -0.17393300 | -2.05664200 | -1.41994600 |
| C | -0.25444100 | -1.85981100 | 1.56197400  |
| C | 0.70756300  | -2.97447400 | -0.99057800 |
| H | 1.04534700  | -3.73265600 | -1.72488100 |
| C | -0.69288500 | -2.08106600 | -2.78269700 |
| H | -0.19682900 | -2.91628900 | -3.30768900 |
| C | -0.32859300 | -0.77988100 | -3.49658400 |
| H | -0.80298000 | 0.07922300  | -2.98942400 |
| H | -0.68106000 | -0.78021100 | -4.53750400 |
| H | 0.75942000  | -0.62739700 | -3.48740500 |
| C | -2.19919300 | -2.33017700 | -2.79516800 |
| H | -2.44445700 | -3.25843500 | -2.26160500 |
| H | -2.57670600 | -2.40272500 | -3.82516800 |
| H | -2.72660000 | -1.50162000 | -2.29751600 |
| C | 2.23396000  | -3.87015100 | 0.59580500  |
| H | 2.44399700  | -4.55735700 | -0.24867900 |
| C | 1.82985500  | -4.71020100 | 1.80510300  |
| H | 1.66800300  | -4.07099700 | 2.68492200  |
| H | 2.61925400  | -5.43466400 | 2.05060400  |
| H | 0.90036800  | -5.26150300 | 1.60452400  |
| C | 3.49733800  | -3.05665400 | 0.87671500  |
| H | 3.78877300  | -2.47600400 | -0.00995400 |
| H | 4.33470300  | -3.70855800 | 1.16476000  |
| H | 3.30776900  | -2.35033000 | 1.70057100  |
| C | -2.06489300 | 0.39498200  | -0.16345500 |
| C | -2.13281900 | 1.75651100  | -0.42812100 |
| C | -3.32651100 | 2.47149500  | -0.36672200 |
| C | -4.49793400 | 1.79681900  | -0.02694100 |
| C | -4.47065900 | 0.42955800  | 0.24427800  |
| C | -3.25286700 | -0.24028800 | 0.17118700  |
| C | 1.35368100  | 0.41238600  | 0.11331300  |
| C | 2.55456800  | 0.13810800  | -0.52797000 |
| C | 3.74052700  | 0.79496000  | -0.20986900 |



|    |             |             |             |
|----|-------------|-------------|-------------|
| C  | 3.72398800  | 1.78788400  | 0.76720400  |
| C  | 2.53537400  | 2.10455900  | 1.42251300  |
| C  | 1.37979100  | 1.40791200  | 1.08091600  |
| Ga | -0.33969100 | -0.59393600 | -0.20234800 |

Table S14

M06-2X-D3/def2-TZVP

**In/N-TS**

| Atomic<br>Number | Coordinates (Angstroms) |             |             |
|------------------|-------------------------|-------------|-------------|
|                  | X                       | Y           | Z           |
| F                | -1.31150300             | 2.65555500  | -0.58082200 |
| F                | -3.70474100             | 3.91543400  | -0.53284200 |
| F                | -5.96481400             | 2.49577400  | -0.08166700 |
| F                | -5.84934100             | -0.17955700 | 0.32261200  |
| F                | -3.45644500             | -1.44346400 | 0.28010900  |
| F                | 2.66667100              | -0.71464100 | -1.46770100 |
| F                | 5.03314100              | 0.33199500  | -0.77332900 |
| F                | 5.17046600              | 2.22750500  | 1.16439800  |
| F                | 2.92460500              | 3.02866400  | 2.45324200  |
| F                | 0.54091600              | 1.91394600  | 1.81717700  |
| O                | 0.08053400              | -2.41545100 | 2.65197800  |
| N                | 1.18831000              | -2.93981600 | 0.21163000  |
| N                | -0.17737800             | -2.10033800 | -1.45491300 |
| C                | -0.04176900             | -1.94379000 | 1.62481400  |
| C                | 0.71209900              | -2.97895600 | -0.99434500 |
| H                | 1.06363400              | -3.75866100 | -1.70076900 |
| C                | -0.71111300             | -2.20026400 | -2.80509700 |
| H                | -0.20537600             | -3.04572400 | -3.30575400 |
| C                | -0.39261400             | -0.92245700 | -3.57946400 |
| H                | -0.89939500             | -0.05910000 | -3.11068400 |
| H                | -0.74658100             | -0.98095400 | -4.61829900 |
| H                | 0.68941800              | -0.73072200 | -3.58083600 |
| C                | -2.21171900             | -2.47958500 | -2.77686300 |
| H                | -2.42512700             | -3.40370700 | -2.22276900 |
| H                | -2.61647600             | -2.57422700 | -3.79464400 |

|    |             |             |             |
|----|-------------|-------------|-------------|
| H  | -2.74107300 | -1.65547100 | -2.27289400 |
| C  | 2.28386100  | -3.82363600 | 0.58004000  |
| H  | 2.56973900  | -4.41520700 | -0.31239200 |
| C  | 1.88142500  | -4.80746000 | 1.67861700  |
| H  | 1.67388500  | -4.28676700 | 2.62280200  |
| H  | 2.69369600  | -5.52651800 | 1.85690700  |
| H  | 0.98099200  | -5.36671000 | 1.38737300  |
| C  | 3.48852400  | -2.97743500 | 0.99082800  |
| H  | 3.79640300  | -2.32048400 | 0.16491600  |
| H  | 4.34139200  | -3.61102800 | 1.27390400  |
| H  | 3.22598900  | -2.34588900 | 1.85448900  |
| C  | -2.31570100 | 0.57196100  | -0.14248000 |
| C  | -2.41210000 | 1.94083800  | -0.34698700 |
| C  | -3.63321100 | 2.61097500  | -0.33128100 |
| C  | -4.79786700 | 1.88064600  | -0.10010000 |
| C  | -4.73755000 | 0.50315300  | 0.10768800  |
| C  | -3.49447900 | -0.12331300 | 0.08239400  |
| C  | 1.52124900  | 0.57856000  | 0.14777600  |
| C  | 2.68930000  | 0.20372400  | -0.49887300 |
| C  | 3.93059200  | 0.73841800  | -0.16407700 |
| C  | 4.00334200  | 1.70461400  | 0.83730400  |
| C  | 2.84743500  | 2.11638600  | 1.49892900  |
| C  | 1.63169600  | 1.53882600  | 1.14185300  |
| In | -0.38774400 | -0.42485700 | -0.15981200 |

Table S15

M06-2X-D3/def2-TZVP

TI/N-TS

| Atomic<br>Number | Coordinates (Angstroms) |             |             |
|------------------|-------------------------|-------------|-------------|
|                  | X                       | Y           | Z           |
| F                | -1.65224800             | 2.80111600  | -0.69678500 |
| F                | -4.18416300             | 3.75567800  | -0.67901900 |
| F                | -6.24889300             | 2.08649200  | -0.14716600 |
| F                | -5.79956600             | -0.53350100 | 0.36377200  |
| F                | -3.27138800             | -1.49368500 | 0.34573500  |

|   |             |             |             |
|---|-------------|-------------|-------------|
| F | 2.65725400  | -0.70228100 | -1.52436500 |
| F | 5.11330600  | 0.04184600  | -0.76723900 |
| F | 5.43989500  | 1.85460100  | 1.22366800  |
| F | 3.28151200  | 2.87727300  | 2.50662100  |
| F | 0.79657000  | 2.06609900  | 1.81058000  |
| O | 0.34688300  | -2.15771500 | 2.67774200  |
| N | 1.20731200  | -2.80132100 | 0.22918600  |
| N | -0.16557300 | -1.96106600 | -1.44296400 |
| C | 0.11753900  | -1.75972500 | 1.63190000  |
| C | 0.69100300  | -2.85314600 | -0.96251600 |
| H | 0.98626600  | -3.67790300 | -1.64472400 |
| C | -0.72126300 | -2.10021700 | -2.77850100 |
| H | -0.26225100 | -2.99286900 | -3.24241500 |
| C | -0.35644800 | -0.88194800 | -3.62529300 |
| H | -0.82070800 | 0.02716700  | -3.20204600 |
| H | -0.72286800 | -0.98412200 | -4.65656500 |
| H | 0.73246900  | -0.73664900 | -3.64544900 |
| C | -2.23312000 | -2.30920400 | -2.72581000 |
| H | -2.48510500 | -3.17557800 | -2.09969900 |
| H | -2.64529500 | -2.46494400 | -3.73318200 |
| H | -2.72344900 | -1.42329500 | -2.29186000 |
| C | 2.24508800  | -3.75199500 | 0.59857200  |
| H | 2.52978200  | -4.32490200 | -0.30624900 |
| C | 1.76270800  | -4.75788500 | 1.64519500  |
| H | 1.53994500  | -4.26388200 | 2.59967300  |
| H | 2.53703400  | -5.51793600 | 1.82354900  |
| H | 0.85203900  | -5.26688100 | 1.29838300  |
| C | 3.47703900  | -2.98196500 | 1.07260600  |
| H | 3.84694200  | -2.32270600 | 0.27393100  |
| H | 4.28674700  | -3.66643100 | 1.36387200  |
| H | 3.21931200  | -2.36051000 | 1.94467200  |
| C | -2.39760200 | 0.63197100  | -0.16712800 |
| C | -2.65561900 | 1.96913300  | -0.42647300 |
| C | -3.95171400 | 2.47997200  | -0.42587800 |
| C | -5.01511600 | 1.62129800  | -0.15226000 |
| C | -4.78300800 | 0.27174300  | 0.11065600  |
| C | -3.47339600 | -0.20196500 | 0.10022900  |
| C | 1.64775000  | 0.67180900  | 0.11689200  |

|    |             |             |             |
|----|-------------|-------------|-------------|
| C  | 2.76882600  | 0.17671000  | -0.53204700 |
| C  | 4.05634000  | 0.55917800  | -0.16286500 |
| C  | 4.22581500  | 1.48047700  | 0.86800700  |
| C  | 3.11545900  | 2.00553800  | 1.52706500  |
| C  | 1.84515400  | 1.58538500  | 1.14110600  |
| Tl | -0.36199800 | -0.13647300 | -0.19303100 |

Table S16

M06-2X-D3/def2-TZVP

**B/P-TS**

| Atomic<br>Number | Coordinates (Angstroms) |             |             |
|------------------|-------------------------|-------------|-------------|
|                  | X                       | Y           | Z           |
| F                | 0.89737300              | -1.94540300 | 2.11832900  |
| F                | -0.16697400             | -4.27730700 | 2.93311500  |
| F                | -2.49776300             | -5.15440600 | 1.84627100  |
| F                | -3.73113000             | -3.68642700 | -0.07200200 |
| F                | -2.69622100             | -1.37649100 | -0.88560000 |
| F                | 2.50103000              | 1.08978200  | 0.81208800  |
| F                | 4.65175500              | 0.81416100  | -0.74508600 |
| F                | 4.50464400              | -0.63326700 | -3.03060300 |
| F                | 2.17318900              | -1.82165400 | -3.74489100 |
| F                | 0.00676700              | -1.56755700 | -2.18070800 |
| O                | -2.19496300             | 1.25904300  | -2.31896800 |
| P                | 0.52851200              | 3.18980200  | -0.62894900 |
| P                | -0.37966500             | 1.19586200  | 1.58715900  |
| C                | -1.46270300             | 0.83241000  | -1.58121600 |
| C                | -0.25454300             | 2.80962000  | 0.80157500  |
| H                | -0.71040600             | 3.59476700  | 1.41769400  |
| C                | -2.14435100             | 1.19750000  | 2.22066800  |
| H                | -2.15541900             | 2.12120600  | 2.82490300  |
| C                | -2.40944800             | 0.02619100  | 3.16874200  |
| H                | -2.49877600             | -0.92255600 | 2.61944600  |
| H                | -3.35915700             | 0.18538000  | 3.70114300  |
| H                | -1.60997000             | -0.08326200 | 3.91537300  |
| C                | -3.21499000             | 1.31527400  | 1.14018500  |

|   |             |             |             |
|---|-------------|-------------|-------------|
| H | -3.02338300 | 2.16780300  | 0.47114800  |
| H | -4.20709100 | 1.45821000  | 1.59647900  |
| H | -3.26154100 | 0.40251700  | 0.52738900  |
| C | 0.40935000  | 5.05848400  | -0.77723900 |
| H | -0.04070000 | 5.19792400  | -1.77583900 |
| C | 1.83503800  | 5.62129000  | -0.82317600 |
| H | 2.33246800  | 5.49347000  | 0.15038700  |
| H | 1.81639400  | 6.69631100  | -1.05790200 |
| H | 2.45002900  | 5.11799400  | -1.58331700 |
| C | -0.44749000 | 5.78193800  | 0.25066000  |
| H | -1.47761000 | 5.39812700  | 0.27284600  |
| H | -0.49185900 | 6.85620100  | 0.01591900  |
| H | -0.01979100 | 5.68263600  | 1.26030300  |
| C | -0.85628700 | -1.55570600 | 0.60071800  |
| C | -0.24315700 | -2.35367100 | 1.56690000  |
| C | -0.77732900 | -3.56099400 | 2.00614200  |
| C | -1.97158300 | -4.01134800 | 1.44998500  |
| C | -2.60449100 | -3.25498800 | 0.46722300  |
| C | -2.03816300 | -2.05016400 | 0.05734200  |
| C | 1.16556000  | -0.24312700 | -0.60939800 |
| C | 2.38317800  | 0.35705600  | -0.28479800 |
| C | 3.51559400  | 0.23008500  | -1.08424200 |
| C | 3.44233700  | -0.51241000 | -2.25926900 |
| C | 2.24487500  | -1.12416800 | -2.62423800 |
| C | 1.13918600  | -0.98500000 | -1.79345700 |
| B | -0.12601300 | -0.17073900 | 0.29734900  |

Table S17

M06-2X-D3/def2-TZVP

**B/As-TS**

| Atomic<br>Number | Coordinates (Angstroms) |             |            |
|------------------|-------------------------|-------------|------------|
|                  | X                       | Y           | Z          |
| F                | 0.87994500              | -2.11483900 | 2.21841900 |
| F                | -0.31426900             | -4.39235400 | 3.01716100 |
| F                | -2.66157100             | -5.15890900 | 1.88037800 |

|    |             |             |             |
|----|-------------|-------------|-------------|
| F  | -3.77570300 | -3.64126000 | -0.07150600 |
| F  | -2.60929800 | -1.39124200 | -0.87180100 |
| F  | 2.60862400  | 0.95076900  | 0.80577400  |
| F  | 4.67999500  | 0.74589800  | -0.86487700 |
| F  | 4.42990200  | -0.63898000 | -3.18074900 |
| F  | 2.08057400  | -1.83483300 | -3.80962500 |
| F  | -0.00616000 | -1.65122800 | -2.13307500 |
| O  | -2.13929100 | 1.34432600  | -2.27043800 |
| As | 0.79489300  | 3.25408500  | -0.57197200 |
| As | -0.22707200 | 1.13024100  | 1.79366800  |
| C  | -1.41786200 | 0.87468100  | -1.54764100 |
| C  | -0.15429400 | 2.81458300  | 0.87509100  |
| H  | -0.73539700 | 3.58163400  | 1.40151900  |
| C  | -2.15031900 | 1.13959800  | 2.33420600  |
| H  | -2.19026100 | 2.05442000  | 2.94890800  |
| C  | -2.47624000 | -0.04920400 | 3.23697000  |
| H  | -2.50218400 | -0.99058300 | 2.66750900  |
| H  | -3.47152100 | 0.08473200  | 3.68836100  |
| H  | -1.74529700 | -0.16159900 | 4.05066000  |
| C  | -3.14245100 | 1.27968500  | 1.18652300  |
| H  | -2.90554400 | 2.14159200  | 0.54468900  |
| H  | -4.16274500 | 1.42097700  | 1.57841200  |
| H  | -3.15476100 | 0.37764900  | 0.55653200  |
| C  | 0.41317300  | 5.20671700  | -0.77984200 |
| H  | 0.00400700  | 5.26795700  | -1.80232200 |
| C  | 1.74431300  | 5.96157500  | -0.74928800 |
| H  | 2.19692300  | 5.91481600  | 0.25323400  |
| H  | 1.59109500  | 7.02274400  | -1.00049400 |
| H  | 2.47028300  | 5.54793800  | -1.46465300 |
| C  | -0.59517000 | 5.79814200  | 0.19177700  |
| H  | -1.56524300 | 5.28219800  | 0.14739300  |
| H  | -0.76842300 | 6.86033200  | -0.04199600 |
| H  | -0.22459200 | 5.74580900  | 1.22745800  |
| C  | -0.81654900 | -1.65161000 | 0.65961700  |
| C  | -0.26724600 | -2.47330400 | 1.64423600  |
| C  | -0.86870700 | -3.65145100 | 2.07484000  |
| C  | -2.07069800 | -4.04502300 | 1.49256900  |
| C  | -2.64189800 | -3.26339000 | 0.49178400  |

|   |             |             |             |
|---|-------------|-------------|-------------|
| C | -2.00795600 | -2.09037900 | 0.08867700  |
| C | 1.21562800  | -0.35737000 | -0.58377800 |
| C | 2.44295600  | 0.24826400  | -0.30544400 |
| C | 3.53565700  | 0.15753500  | -1.16273100 |
| C | 3.40877700  | -0.55266900 | -2.35288900 |
| C | 2.20028400  | -1.16913600 | -2.67445900 |
| C | 1.13661500  | -1.06831100 | -1.78623000 |
| B | -0.02319000 | -0.30198700 | 0.38257800  |

Table S18

M06-2X-D3/def2-TZVP

**B/Sb-TS**

| Atomic<br>Number | Coordinates (Angstroms) |             |             |
|------------------|-------------------------|-------------|-------------|
|                  | X                       | Y           | Z           |
| F                | 0.75068800              | -2.41948100 | 2.26781100  |
| F                | -0.67991700             | -4.59823100 | 2.95986700  |
| F                | -3.06538400             | -5.08811000 | 1.74848200  |
| F                | -3.97366500             | -3.40357100 | -0.17248400 |
| F                | -2.56761000             | -1.26037000 | -0.87491100 |
| F                | 2.73529000              | 0.69496700  | 0.84303500  |
| F                | 4.68894400              | 0.62931500  | -0.97081700 |
| F                | 4.28989600              | -0.59169500 | -3.36068300 |
| F                | 1.90461400              | -1.74083300 | -3.92351800 |
| F                | -0.07649100             | -1.67190400 | -2.11701400 |
| O                | -1.86360300             | 1.78571600  | -1.97383800 |
| Sb               | 1.58373300              | 3.50063800  | -0.19411200 |
| Sb               | 0.03610300              | 1.03556700  | 2.17321100  |
| C                | -1.27255100             | 1.07105400  | -1.33767000 |
| C                | 0.14316600              | 2.81652400  | 0.99208900  |
| H                | -0.73539700             | 3.46139000  | 1.13343500  |
| C                | -2.13213600             | 1.10396700  | 2.58163100  |
| H                | -2.20525400             | 1.98578200  | 3.23997400  |
| C                | -2.55466100             | -0.12856000 | 3.38041200  |
| H                | -2.51598400             | -1.03963500 | 2.76173800  |
| H                | -3.59478300             | -0.02215000 | 3.72951500  |

|   |             |             |             |
|---|-------------|-------------|-------------|
| H | -1.92098200 | -0.29341300 | 4.26471600  |
| C | -3.02841200 | 1.32378400  | 1.36990900  |
| H | -2.74064700 | 2.21594100  | 0.79366800  |
| H | -4.07658100 | 1.45930700  | 1.68599600  |
| H | -3.00524500 | 0.45871300  | 0.68930400  |
| C | 0.65478200  | 5.39221600  | -0.85210700 |
| H | 0.64793700  | 5.29727500  | -1.95108300 |
| C | 1.56759900  | 6.55921400  | -0.47186000 |
| H | 1.61773800  | 6.68349700  | 0.62155700  |
| H | 1.18680900  | 7.50422800  | -0.89283100 |
| H | 2.59602500  | 6.42460500  | -0.84020800 |
| C | -0.77105400 | 5.60508400  | -0.36620000 |
| H | -1.44040500 | 4.78696000  | -0.67141800 |
| H | -1.18068100 | 6.54358500  | -0.77488100 |
| H | -0.80984000 | 5.68389700  | 0.73195900  |
| C | -0.84735000 | -1.74831700 | 0.68361300  |
| C | -0.41126200 | -2.65102500 | 1.65455500  |
| C | -1.13553100 | -3.77582500 | 2.03230900  |
| C | -2.35640800 | -4.02771800 | 1.41131600  |
| C | -2.82135700 | -3.16044700 | 0.42626900  |
| C | -2.06306500 | -2.04654600 | 0.07231600  |
| C | 1.24649700  | -0.50482300 | -0.55084100 |
| C | 2.49248500  | 0.08023000  | -0.31144300 |
| C | 3.53116100  | 0.05505400  | -1.23722400 |
| C | 3.32558100  | -0.56775700 | -2.46462200 |
| C | 2.09606400  | -1.16088500 | -2.75254400 |
| C | 1.08794600  | -1.12375100 | -1.79695200 |
| B | 0.07534100  | -0.47634400 | 0.49024000  |

Table S19

M06-2X-D3/def2-TZVP

**B/Bi-TS**

| Atomic<br>Number | Coordinates (Angstroms) |            |             |
|------------------|-------------------------|------------|-------------|
|                  | X                       | Y          | Z           |
| F                | -3.07587000             | 0.36452800 | -2.22180500 |



|    |             |             |             |
|----|-------------|-------------|-------------|
| F  | -5.74040200 | -0.00148300 | -1.98857100 |
| F  | -6.86090100 | -0.22503000 | 0.47959700  |
| F  | -5.30317400 | -0.03874000 | 2.69083000  |
| F  | -2.67860400 | 0.35083000  | 2.47390200  |
| F  | 1.04784800  | 1.01917200  | -1.93361800 |
| F  | 2.44997300  | 3.27808200  | -1.93548000 |
| F  | 1.74990000  | 5.32133000  | -0.29084000 |
| F  | -0.37231500 | 5.06764500  | 1.36941700  |
| F  | -1.78317200 | 2.80293800  | 1.40503400  |
| O  | 0.51156500  | -0.02889400 | 2.91387500  |
| Bi | 3.24360700  | -0.24261400 | -0.02841700 |
| Bi | -0.31125400 | -1.53407100 | -1.09715000 |
| C  | 0.05969100  | 0.38880300  | 1.97184200  |
| C  | 1.59212900  | -1.48685500 | 0.09294800  |
| H  | 1.66436800  | -2.32814100 | 0.79706400  |
| C  | -1.39744400 | -3.02010400 | 0.30005000  |
| H  | -0.85519200 | -3.95317900 | 0.07567600  |
| C  | -2.85194500 | -3.17863900 | -0.12899800 |
| H  | -3.44558600 | -2.28752000 | 0.13067800  |
| H  | -3.31837400 | -4.03349800 | 0.38974400  |
| H  | -2.95960800 | -3.35332200 | -1.21083500 |
| C  | -1.26233800 | -2.70878000 | 1.78176100  |
| H  | -0.21034100 | -2.59687200 | 2.08187500  |
| H  | -1.70054200 | -3.51565900 | 2.39477300  |
| H  | -1.78772000 | -1.77830600 | 2.04715200  |
| C  | 4.53733600  | -1.28375300 | 1.57715500  |
| H  | 4.82457500  | -0.45226100 | 2.24131000  |
| C  | 5.79123700  | -1.84125200 | 0.90859700  |
| H  | 5.53976500  | -2.64151000 | 0.19416200  |
| H  | 6.47447200  | -2.27712200 | 1.65784300  |
| H  | 6.35534900  | -1.06969000 | 0.36229000  |
| C  | 3.79942700  | -2.34217700 | 2.37907700  |
| H  | 2.87440000  | -1.95691300 | 2.83313600  |
| H  | 4.43737000  | -2.72634500 | 3.19345800  |
| H  | 3.53131200  | -3.20267700 | 1.74521200  |
| C  | -2.77440800 | 0.38156600  | 0.10638100  |
| C  | -3.61574800 | 0.28527000  | -1.00290100 |
| C  | -4.98735800 | 0.08348500  | -0.90666700 |

|   |             |             |             |
|---|-------------|-------------|-------------|
| C | -5.56129700 | -0.03254000 | 0.35726200  |
| C | -4.75900400 | 0.06387300  | 1.49155800  |
| C | -3.38965700 | 0.27729100  | 1.35273600  |
| C | -0.43984800 | 1.79893000  | -0.25986700 |
| C | 0.66459000  | 1.98454600  | -1.09977200 |
| C | 1.40898800  | 3.15845700  | -1.13222100 |
| C | 1.05273900  | 4.20531500  | -0.28656500 |
| C | -0.04079700 | 4.07188200  | 0.56797000  |
| C | -0.76721500 | 2.88613000  | 0.56235800  |
| B | -1.23122600 | 0.45338600  | -0.21098700 |

Table S20

M06-2X-D3/def2-TZVP

**B/N-Prod**

| Atomic<br>Number | Coordinates (Angstroms) |             |            |
|------------------|-------------------------|-------------|------------|
|                  | X                       | Y           | Z          |
| F                | 2.76795000              | -2.04193800 | 2.67676200 |
| F                | 0.24413400              | -2.30177300 | 1.86708900 |
| F                | -1.34789700             | -0.12143500 | 1.59989000 |
| F                | -0.36162200             | 2.35144600  | 2.15415000 |
| F                | 2.17204600              | 2.63019600  | 2.97984900 |
| F                | 6.40525000              | -0.23015700 | 5.09869200 |
| F                | 8.28855300              | -1.98309200 | 4.45648800 |
| F                | 8.26300600              | -3.21774900 | 2.03196900 |
| F                | 6.28487400              | -2.65605800 | 0.25763800 |
| F                | 4.37235900              | -0.90406800 | 0.88328600 |
| O                | 5.05096100              | 2.38652200  | 1.67050500 |
| N                | 4.98463100              | 2.81785700  | 3.92616700 |
| N                | 4.01160900              | 1.02270400  | 4.86206500 |
| C                | 4.74365800              | 1.99492300  | 2.75896900 |
| C                | 4.49894200              | 2.21544600  | 5.01613700 |
| H                | 4.51464400              | 2.71773500  | 5.98917300 |
| C                | 3.35139300              | 0.31992200  | 5.97314700 |
| H                | 3.81910700              | 0.70022700  | 6.89693200 |
| C                | 3.58553300              | -1.18309200 | 5.89378400 |

|   |             |             |            |
|---|-------------|-------------|------------|
| H | 3.20891900  | -1.59122900 | 4.94474100 |
| H | 3.04686300  | -1.67643100 | 6.71388000 |
| H | 4.65100700  | -1.42443600 | 5.98177300 |
| C | 1.85849700  | 0.65341200  | 6.01769900 |
| H | 1.69090500  | 1.73932700  | 5.96887900 |
| H | 1.42306400  | 0.27543200  | 6.95324600 |
| H | 1.32636100  | 0.18285200  | 5.17921700 |
| C | 5.47976800  | 4.19170600  | 3.81886000 |
| H | 6.14412300  | 4.16137200  | 2.94276500 |
| C | 6.27873500  | 4.59536900  | 5.05005400 |
| H | 5.63314400  | 4.70918200  | 5.93473300 |
| H | 6.75764800  | 5.56752300  | 4.87369700 |
| H | 7.06371000  | 3.85961900  | 5.27421000 |
| C | 4.32309200  | 5.14001000  | 3.51734400 |
| H | 3.79136800  | 4.81688100  | 2.61281100 |
| H | 4.69730100  | 6.16101500  | 3.35959700 |
| H | 3.60897100  | 5.15705500  | 4.35555900 |
| C | 2.60897200  | 0.31816100  | 2.78962700 |
| C | 2.05213300  | -0.92901200 | 2.52020300 |
| C | 0.72923600  | -1.09637700 | 2.11400100 |
| C | -0.09068000 | 0.02027300  | 1.97916900 |
| C | 0.41727100  | 1.28649500  | 2.25719800 |
| C | 1.74399800  | 1.40204000  | 2.65772800 |
| C | 5.24624000  | -0.53681000 | 3.04538000 |
| C | 6.30326500  | -0.82961200 | 3.90369500 |
| C | 7.31686100  | -1.73315800 | 3.59111200 |
| C | 7.30864400  | -2.36108600 | 2.35123700 |
| C | 6.29157500  | -2.07370200 | 1.44519300 |
| C | 5.29996900  | -1.16372800 | 1.79934800 |
| B | 4.11226300  | 0.59147700  | 3.33830200 |

Table S21

M06-2X-D3/def2-TZVP

**AI/N-Prod**

| Atomic<br>Number | Coordinates (Angstroms) |   |   |
|------------------|-------------------------|---|---|
|                  | X                       | Y | Z |

---

|   |             |             |            |
|---|-------------|-------------|------------|
| F | 2.59170800  | -2.09256500 | 2.54568500 |
| F | 0.01140700  | -2.37168100 | 1.83777300 |
| F | -1.54367000 | -0.18153200 | 1.49220700 |
| F | -0.51297200 | 2.30113700  | 1.85065200 |
| F | 2.07447700  | 2.59053200  | 2.55876900 |
| F | 6.80587500  | -0.49941300 | 4.76289500 |
| F | 8.44475100  | -2.58661500 | 4.32600400 |
| F | 8.12826400  | -4.11833100 | 2.10996300 |
| F | 6.16353700  | -3.55792800 | 0.33016600 |
| F | 4.52167400  | -1.46454300 | 0.75682700 |
| O | 5.43385000  | 3.04818600  | 1.73630900 |
| N | 4.98552000  | 3.15236400  | 3.97752900 |
| N | 4.15686900  | 1.20371500  | 4.90972300 |
| C | 5.03516300  | 2.44019400  | 2.69045800 |
| C | 4.49823800  | 2.45468000  | 5.01136700 |
| H | 4.39056000  | 2.98124200  | 5.97071700 |
| C | 3.52415500  | 0.52490800  | 6.05040800 |
| H | 3.97420800  | 0.92922500  | 6.97381200 |
| C | 3.81811900  | -0.96760700 | 5.97213300 |
| H | 3.38573000  | -1.39904600 | 5.05315500 |
| H | 3.36995000  | -1.49046000 | 6.82732100 |
| H | 4.90014900  | -1.15105900 | 5.97064500 |
| C | 2.02224700  | 0.80459300  | 6.06891000 |
| H | 1.81879800  | 1.88523100  | 6.09606900 |
| H | 1.55921000  | 0.34235000  | 6.95194600 |
| H | 1.54542300  | 0.38760900  | 5.16924700 |
| C | 5.29374700  | 4.58754700  | 4.04792600 |
| H | 5.90257200  | 4.76015500  | 3.14975800 |
| C | 6.11464000  | 4.93907400  | 5.28232500 |
| H | 5.52591200  | 4.85532300  | 6.20902700 |
| H | 6.45424600  | 5.98117400  | 5.21126200 |
| H | 6.99984300  | 4.29361600  | 5.36605100 |
| C | 4.01046700  | 5.40451300  | 3.92972500 |
| H | 3.46064100  | 5.12433000  | 3.02111300 |
| H | 4.24057100  | 6.47801100  | 3.88358900 |
| H | 3.35604100  | 5.23195500  | 4.79922800 |
| C | 2.44745200  | 0.26256600  | 2.50395800 |

|    |             |             |            |
|----|-------------|-------------|------------|
| C  | 1.86952400  | -0.98943800 | 2.33607200 |
| C  | 0.53176100  | -1.16481400 | 1.98778000 |
| C  | -0.27136100 | -0.03894700 | 1.81555400 |
| C  | 0.26032400  | 1.23688700  | 1.99592400 |
| C  | 1.60300500  | 1.35392200  | 2.34250700 |
| C  | 5.57853300  | -0.92546000 | 2.79125400 |
| C  | 6.61119900  | -1.24161600 | 3.66382000 |
| C  | 7.47737700  | -2.31272400 | 3.46429000 |
| C  | 7.31612200  | -3.09978200 | 2.32603000 |
| C  | 6.30312400  | -2.81229000 | 1.41353300 |
| C  | 5.46408400  | -1.72934700 | 1.66244400 |
| Al | 4.31929200  | 0.57138800  | 3.08008600 |

Table S22

M06-2X-D3/def2-TZVP

**Ga/N-Prod**

| Atomic<br>Number | Coordinates (Angstroms) |             |            |
|------------------|-------------------------|-------------|------------|
|                  | X                       | Y           | Z          |
| F                | 2.57553200              | -2.06089900 | 2.64748700 |
| F                | -0.01193300             | -2.44859500 | 2.01506400 |
| F                | -1.61750300             | -0.32415300 | 1.51544700 |
| F                | -0.63111900             | 2.19682900  | 1.64154400 |
| F                | 1.96323800              | 2.59609300  | 2.26231200 |
| F                | 6.79498800              | -0.28508600 | 4.64358400 |
| F                | 8.46060100              | -2.38021500 | 4.35273200 |
| F                | 8.13532900              | -4.09114800 | 2.27248200 |
| F                | 6.13720000              | -3.70339900 | 0.48436600 |
| F                | 4.46851300              | -1.60466800 | 0.76558400 |
| O                | 5.39870900              | 3.14264500  | 1.71269600 |
| N                | 4.96679500              | 3.18552900  | 3.95685400 |
| N                | 4.10410400              | 1.24340000  | 4.87744800 |
| C                | 4.99660200              | 2.52527000  | 2.65991900 |
| C                | 4.47919000              | 2.47456700  | 4.99250700 |
| H                | 4.40871300              | 2.99219000  | 5.96083800 |
| C                | 3.49445400              | 0.53973300  | 6.01056400 |

|    |             |             |            |
|----|-------------|-------------|------------|
| H  | 3.91572800  | 0.96492900  | 6.93878100 |
| C  | 3.85548700  | -0.93808800 | 5.93449300 |
| H  | 3.44669300  | -1.38618800 | 5.01326600 |
| H  | 3.43079600  | -1.48063300 | 6.78954000 |
| H  | 4.94526100  | -1.07065900 | 5.93493800 |
| C  | 1.98187500  | 0.75492500  | 6.01249900 |
| H  | 1.73407400  | 1.82541700  | 6.05752900 |
| H  | 1.52719500  | 0.25595700  | 6.87970800 |
| H  | 1.53517100  | 0.33643400  | 5.09815900 |
| C  | 5.32658700  | 4.60594400  | 4.08251600 |
| H  | 5.81457000  | 4.82783200  | 3.12383700 |
| C  | 6.32197200  | 4.84126000  | 5.21246800 |
| H  | 5.86944900  | 4.67341400  | 6.20231700 |
| H  | 6.66930500  | 5.88310400  | 5.18795700 |
| H  | 7.19567100  | 4.18340500  | 5.10983600 |
| C  | 4.07014700  | 5.46308000  | 4.20252000 |
| H  | 3.38556100  | 5.25918700  | 3.36771300 |
| H  | 4.33069900  | 6.53042800  | 4.18884300 |
| H  | 3.53959800  | 5.25728100  | 5.14615700 |
| C  | 2.37616300  | 0.27904000  | 2.41077400 |
| C  | 1.82515400  | -0.99460300 | 2.35982800 |
| C  | 0.48512600  | -1.22347900 | 2.05509800 |
| C  | -0.34311400 | -0.13147900 | 1.80243600 |
| C  | 0.16610600  | 1.16431600  | 1.86419400 |
| C  | 1.51284100  | 1.33983000  | 2.17105100 |
| C  | 5.55365500  | -0.89009800 | 2.72990200 |
| C  | 6.60118900  | -1.11609900 | 3.61092400 |
| C  | 7.47870300  | -2.18923500 | 3.48528200 |
| C  | 7.31265300  | -3.06839500 | 2.41725300 |
| C  | 6.28201700  | -2.86963400 | 1.50062600 |
| C  | 5.42978200  | -1.78143700 | 1.67163100 |
| Ga | 4.27282500  | 0.62738100  | 2.95044500 |

-----

Table S23

M06-2X-D3/def2-TZVP

**In/N-Prod**

-----

| Atomic<br>Number | Coordinates (Angstroms) |             |            |
|------------------|-------------------------|-------------|------------|
|                  | X                       | Y           | Z          |
| F                | 2.22365600              | -1.74640100 | 3.16577300 |
| F                | -0.21388200             | -2.63756400 | 2.40499000 |
| F                | -1.82391200             | -1.04662500 | 0.91348900 |
| F                | -1.00619500             | 1.42738000  | 0.17951600 |
| F                | 1.43098300              | 2.31811000  | 0.92302700 |
| F                | 6.77392200              | 0.40897100  | 4.08700700 |
| F                | 8.49761500              | -1.66856100 | 4.21467400 |
| F                | 8.00955800              | -3.91661400 | 2.77756300 |
| F                | 5.80259400              | -4.09497200 | 1.22043400 |
| F                | 4.07503100              | -2.02354500 | 1.08699700 |
| O                | 5.12978400              | 3.70022800  | 1.77897100 |
| N                | 4.86891500              | 3.42010400  | 4.02698600 |
| N                | 3.91328600              | 1.45601700  | 4.86646400 |
| C                | 4.75165100              | 2.97524200  | 2.65895600 |
| C                | 4.44867100              | 2.61310700  | 5.03304700 |
| H                | 4.59323400              | 3.01330400  | 6.04896900 |
| C                | 3.51945500              | 0.65699300  | 6.02585500 |
| H                | 3.71720800              | 1.25270100  | 6.93634400 |
| C                | 4.35741100              | -0.61731900 | 6.07662900 |
| H                | 4.14807600              | -1.24203700 | 5.19378800 |
| H                | 4.10955500              | -1.20201500 | 6.97327800 |
| H                | 5.43053400              | -0.38154900 | 6.08876600 |
| C                | 2.02890400              | 0.34444600  | 5.95038500 |
| H                | 1.43378600              | 1.26514800  | 5.87888000 |
| H                | 1.71000300              | -0.21311400 | 6.84183800 |
| H                | 1.82123600              | -0.27967500 | 5.06862000 |
| C                | 5.49756500              | 4.71876500  | 4.33169200 |
| H                | 5.71555000              | 5.13376100  | 3.33915600 |
| C                | 6.81070800              | 4.52584500  | 5.08371300 |
| H                | 6.64328800              | 4.11957100  | 6.09384900 |
| H                | 7.32683300              | 5.48925600  | 5.19617400 |
| H                | 7.47187200              | 3.83793400  | 4.53923200 |
| C                | 4.52989600              | 5.65174200  | 5.05164800 |
| H                | 3.59997000              | 5.76719200  | 4.47860100 |
| H                | 4.98660400              | 6.64372800  | 5.17221600 |

|    |             |             |            |
|----|-------------|-------------|------------|
| H  | 4.27758400  | 5.28159900  | 6.05793500 |
| C  | 1.90775800  | 0.30734700  | 2.05473600 |
| C  | 1.45173700  | -0.95319500 | 2.41047800 |
| C  | 0.19997500  | -1.43460100 | 2.04183000 |
| C  | -0.62965800 | -0.61586800 | 1.27654500 |
| C  | -0.20762800 | 0.65765700  | 0.90087900 |
| C  | 1.05539000  | 1.09494900  | 1.29715400 |
| C  | 5.37340500  | -0.74167400 | 2.57845600 |
| C  | 6.51725800  | -0.68842300 | 3.35887500 |
| C  | 7.41975000  | -1.74361800 | 3.44909300 |
| C  | 7.16763000  | -2.90092200 | 2.71362100 |
| C  | 6.03024200  | -2.99125400 | 1.91311200 |
| C  | 5.15504100  | -1.90767900 | 1.86085300 |
| In | 3.92050400  | 0.89735500  | 2.66285200 |

Table S24

M06-2X-D3/def2-TZVP

**TI/N-Prod**

| Atomic<br>Number | Coordinates (Angstroms) |             |            |
|------------------|-------------------------|-------------|------------|
|                  | X                       | Y           | Z          |
| F                | 2.29144200              | -1.68158100 | 3.17297400 |
| F                | -0.11038900             | -2.74148300 | 2.53360000 |
| F                | -1.83452700             | -1.33879900 | 0.98289800 |
| F                | -1.16636200             | 1.12041800  | 0.06987200 |
| F                | 1.23629500              | 2.18473300  | 0.69499700 |
| F                | 6.69528400              | 0.65572900  | 3.96008900 |
| F                | 8.39620700              | -1.41084100 | 4.30316700 |
| F                | 7.94427300              | -3.76156400 | 3.02643900 |
| F                | 5.78591500              | -4.05321600 | 1.41801700 |
| F                | 4.07135800              | -1.99374600 | 1.07387600 |
| O                | 5.05563100              | 3.84269300  | 1.78905700 |
| N                | 4.85051500              | 3.45824300  | 4.02541900 |
| N                | 3.84860600              | 1.50543000  | 4.85213600 |
| C                | 4.68941100              | 3.10873100  | 2.66468300 |
| C                | 4.44047500              | 2.62035700  | 5.03093300 |



|    |             |             |            |
|----|-------------|-------------|------------|
| H  | 4.66468700  | 2.98650700  | 6.04594500 |
| C  | 3.49510400  | 0.67695400  | 5.99941000 |
| H  | 3.71493600  | 1.24362900  | 6.92473500 |
| C  | 4.34211100  | -0.59296900 | 5.98586100 |
| H  | 4.12009400  | -1.18279700 | 5.08296000 |
| H  | 4.11714600  | -1.21195000 | 6.86557700 |
| H  | 5.41391100  | -0.34855700 | 5.98795800 |
| C  | 2.00536000  | 0.35646900  | 5.95380100 |
| H  | 1.40331300  | 1.27509500  | 5.93075500 |
| H  | 1.71347800  | -0.23381400 | 6.83339800 |
| H  | 1.78067500  | -0.23648400 | 5.05523600 |
| C  | 5.57514700  | 4.69965800  | 4.36984000 |
| H  | 5.74653700  | 5.17700500  | 3.39718500 |
| C  | 6.92480300  | 4.37497300  | 5.00256900 |
| H  | 6.80507200  | 3.90148900  | 5.98976000 |
| H  | 7.50763200  | 5.29561300  | 5.14397300 |
| H  | 7.49869600  | 3.69244500  | 4.36095300 |
| C  | 4.72074500  | 5.62871800  | 5.22486700 |
| H  | 3.75578900  | 5.82914300  | 4.73993600 |
| H  | 5.24163400  | 6.58581800  | 5.36544700 |
| H  | 4.53011800  | 5.20985500  | 6.22515000 |
| C  | 1.83536200  | 0.27809900  | 1.94256000 |
| C  | 1.46369100  | -0.97938600 | 2.39212900 |
| C  | 0.23028200  | -1.54520400 | 2.08413700 |
| C  | -0.65840600 | -0.82299000 | 1.28874700 |
| C  | -0.31368400 | 0.44331700  | 0.82091600 |
| C  | 0.93138200  | 0.97309000  | 1.15640600 |
| C  | 5.33664700  | -0.60622400 | 2.49834500 |
| C  | 6.45519000  | -0.49022500 | 3.30554800 |
| C  | 7.34584500  | -1.54056700 | 3.50680000 |
| C  | 7.11089400  | -2.75069700 | 2.85612300 |
| C  | 5.99827400  | -2.89946400 | 2.02964200 |
| C  | 5.13072100  | -1.82079500 | 1.86535800 |
| TI | 3.83503100  | 1.05037900  | 2.45376400 |

-----

Table S25

M06-2X-D3/def2-TZVP

**B/P-Prod**

---

| Atomic<br>Number | Coordinates (Angstroms) |             |             |
|------------------|-------------------------|-------------|-------------|
|                  | X                       | Y           | Z           |
| F                | 3.01451800              | -1.99197500 | 1.82198900  |
| F                | 0.57199400              | -2.19687600 | 0.80089200  |
| F                | -1.20833500             | -0.16573300 | 1.05607700  |
| F                | -0.49008600             | 2.10466700  | 2.37206200  |
| F                | 1.96331800              | 2.33050700  | 3.41338800  |
| F                | 5.61372100              | -1.38404700 | 5.13114100  |
| F                | 7.51242300              | -3.08977400 | 4.39231800  |
| F                | 8.18129300              | -3.36395100 | 1.77217500  |
| F                | 6.89542600              | -1.89035700 | -0.11097500 |
| F                | 4.97742100              | -0.15842100 | 0.62002100  |
| O                | 4.39462800              | 2.50713800  | 1.72865800  |
| P                | 6.06162900              | 2.67040900  | 3.88685400  |
| P                | 4.05709200              | 0.94285200  | 5.13478600  |
| C                | 4.72076900              | 1.91810700  | 2.71572500  |
| C                | 5.08841600              | 2.21239700  | 5.35965900  |
| H                | 5.22020800              | 2.71605300  | 6.32210100  |
| C                | 3.00355400              | 0.39395000  | 6.53569800  |
| H                | 3.20080600              | 1.14119200  | 7.32096700  |
| C                | 3.38341000              | -1.00133800 | 7.03516800  |
| H                | 3.24892700              | -1.75249800 | 6.24357300  |
| H                | 2.72877300              | -1.27066400 | 7.87689200  |
| H                | 4.42686100              | -1.04825900 | 7.37129900  |
| C                | 1.53232700              | 0.46896900  | 6.10680700  |
| H                | 1.26118300              | 1.46312400  | 5.72538600  |
| H                | 0.89113800              | 0.23739600  | 6.96953800  |
| H                | 1.31947800              | -0.27165600 | 5.32081300  |
| C                | 5.66645500              | 4.48634900  | 3.65008200  |
| H                | 5.76654800              | 4.57099000  | 2.55371300  |
| C                | 6.72190800              | 5.35978000  | 4.32684200  |
| H                | 6.67551700              | 5.25740400  | 5.42282500  |
| H                | 6.54930700              | 6.42002800  | 4.08793500  |
| H                | 7.73897100              | 5.09544400  | 4.00575100  |
| C                | 4.24771100              | 4.88739800  | 4.04114000  |

---

|   |            |             |            |
|---|------------|-------------|------------|
| H | 3.49273500 | 4.25832100  | 3.55084700 |
| H | 4.05985000 | 5.93279200  | 3.75196700 |
| H | 4.10515000 | 4.81435100  | 5.13067900 |
| C | 2.61972100 | 0.19952400  | 2.63689800 |
| C | 2.20111300 | -0.95084100 | 1.96956600 |
| C | 0.92285900 | -1.08598900 | 1.42724500 |
| C | 0.00763500 | -0.04693000 | 1.55675100 |
| C | 0.37854300 | 1.11751900  | 2.22481200 |
| C | 1.66450100 | 1.21161700  | 2.74171000 |
| C | 5.23515000 | -0.65970700 | 2.90132800 |
| C | 5.91031500 | -1.45042900 | 3.82499300 |
| C | 6.90286400 | -2.36202800 | 3.46978000 |
| C | 7.24444000 | -2.50509000 | 2.13035100 |
| C | 6.58470500 | -1.74613100 | 1.16576900 |
| C | 5.60597200 | -0.84461700 | 1.56764900 |
| B | 4.09949100 | 0.45025800  | 3.22230200 |

Table S26

M06-2X-D3/def2-TZVP

**B/As-Prod**

| Atomic<br>Number | Coordinates (Angstroms) |             |            |
|------------------|-------------------------|-------------|------------|
|                  | X                       | Y           | Z          |
| F                | 3.10131900              | -1.71153100 | 1.27808000 |
| F                | 0.60152000              | -2.02398800 | 0.44478800 |
| F                | -1.32500100             | -0.24839300 | 1.15351500 |
| F                | -0.69241800             | 1.86782500  | 2.74262400 |
| F                | 1.81215700              | 2.20170600  | 3.59856700 |
| F                | 4.03453700              | -2.01131200 | 4.30350000 |
| F                | 5.80549900              | -4.01365500 | 3.99529600 |
| F                | 7.89614700              | -3.72225400 | 2.28215300 |
| F                | 8.19289500              | -1.41419700 | 0.88821800 |
| F                | 6.43350300              | 0.57681600  | 1.17959900 |
| O                | 4.18691200              | 2.70337200  | 1.68071500 |
| As               | 6.20979800              | 2.78895200  | 3.67778600 |
| As               | 4.10822800              | 0.95767000  | 5.07299500 |

|   |             |             |            |
|---|-------------|-------------|------------|
| C | 4.65396700  | 2.02604400  | 2.54618400 |
| C | 5.25125400  | 2.28010000  | 5.29433200 |
| H | 5.43938600  | 2.75687100  | 6.26107900 |
| C | 3.07337600  | 0.34426500  | 6.62568200 |
| H | 3.02757100  | 1.22768400  | 7.28021800 |
| C | 3.77808200  | -0.80750500 | 7.34006400 |
| H | 3.89674400  | -1.67037200 | 6.67016300 |
| H | 3.17054900  | -1.12409400 | 8.20158400 |
| H | 4.76966700  | -0.51427500 | 7.71050900 |
| C | 1.67292000  | -0.02830900 | 6.13790200 |
| H | 1.16868300  | 0.81908800  | 5.65211600 |
| H | 1.06027900  | -0.35048600 | 6.99287600 |
| H | 1.72007800  | -0.86366500 | 5.42221900 |
| C | 5.62630600  | 4.68801600  | 3.49021100 |
| H | 5.55370100  | 4.75947700  | 2.39181000 |
| C | 6.70069700  | 5.64213200  | 4.00340600 |
| H | 6.82464500  | 5.55096800  | 5.09416200 |
| H | 6.41796200  | 6.68497600  | 3.79044600 |
| H | 7.67739100  | 5.45197000  | 3.53670200 |
| C | 4.25590500  | 4.98106500  | 4.08845900 |
| H | 3.48677200  | 4.28783500  | 3.72059200 |
| H | 3.94310700  | 6.00384400  | 3.82489300 |
| H | 4.28120800  | 4.91571500  | 5.18746600 |
| C | 2.58343000  | 0.26672500  | 2.47935800 |
| C | 2.21083700  | -0.80389400 | 1.66620100 |
| C | 0.90490000  | -0.99115700 | 1.21288300 |
| C | -0.08384700 | -0.08131000 | 1.57098100 |
| C | 0.24236000  | 1.00482200  | 2.37919100 |
| C | 1.55697200  | 1.15610600  | 2.80153500 |
| C | 5.17625700  | -0.62798300 | 2.77637800 |
| C | 5.06240700  | -1.83687800 | 3.45971300 |
| C | 5.95684300  | -2.88789300 | 3.31677800 |
| C | 7.02919500  | -2.73884100 | 2.43803300 |
| C | 7.18086800  | -1.55356900 | 1.72690900 |
| C | 6.25436900  | -0.52513000 | 1.90242400 |
| B | 4.08241800  | 0.53787300  | 2.99265100 |

---

Table S27

M06-2X-D3/def2-TZVP

**B/Sb-Prod**

| Atomic<br>Number | Coordinates (Angstroms) |             |             |
|------------------|-------------------------|-------------|-------------|
|                  | X                       | Y           | Z           |
| F                | 3.71746400              | 0.01237700  | 0.29783200  |
| F                | 1.39122800              | -0.43541000 | -0.97037400 |
| F                | -0.91133900             | -0.64466400 | 0.45005600  |
| F                | -0.86146100             | -0.38614200 | 3.15702500  |
| F                | 1.43100200              | 0.08211800  | 4.42884100  |
| F                | 4.06325100              | -2.07078500 | 4.46689800  |
| F                | 5.73732100              | -4.14824100 | 4.15297700  |
| F                | 7.78314900              | -3.98587200 | 2.37077200  |
| F                | 8.12942100              | -1.72879300 | 0.90868100  |
| F                | 6.46507700              | 0.33803900  | 1.19866700  |
| O                | 4.18409600              | 2.53689300  | 1.64525500  |
| Sb               | 6.48003300              | 2.81908100  | 3.59433700  |
| Sb               | 4.07741800              | 0.97694300  | 5.26888700  |
| C                | 4.70253800              | 1.88192400  | 2.50430900  |
| C                | 5.47434300              | 2.34382900  | 5.45164200  |
| H                | 5.73941300              | 2.80183100  | 6.41090500  |
| C                | 3.12800700              | 0.37162200  | 7.13309900  |
| H                | 3.91009700              | 0.59505400  | 7.87475400  |
| C                | 2.80962000              | -1.11947300 | 7.12921500  |
| H                | 2.09011500              | -1.36658300 | 6.33587400  |
| H                | 2.35487000              | -1.39303100 | 8.09431000  |
| H                | 3.70264900              | -1.74135700 | 6.98356400  |
| C                | 1.89748100              | 1.23696700  | 7.39619400  |
| H                | 2.13984500              | 2.30813100  | 7.43442700  |
| H                | 1.45974200              | 0.95514800  | 8.36713000  |
| H                | 1.12877300              | 1.08006400  | 6.62626200  |
| C                | 5.62651200              | 4.81350300  | 3.23464300  |
| H                | 5.45725100              | 4.75517100  | 2.14589100  |
| C                | 6.62658900              | 5.92110600  | 3.55122200  |
| H                | 6.84302500              | 5.96937100  | 4.63037400  |
| H                | 6.22081400              | 6.90286200  | 3.25635000  |

|   |            |             |            |
|---|------------|-------------|------------|
| H | 7.58215400 | 5.78300700  | 3.02458700 |
| C | 4.28491300 | 5.03018200  | 3.92078300 |
| H | 3.55655200 | 4.25057300  | 3.65365300 |
| H | 3.85769300 | 6.00109200  | 3.61938500 |
| H | 4.38957800 | 5.03680900  | 5.01722400 |
| C | 2.67657800 | 0.09309300  | 2.40576400 |
| C | 2.60493800 | -0.05716300 | 1.01978700 |
| C | 1.41302000 | -0.29969500 | 0.34392900 |
| C | 0.23006700 | -0.41054800 | 1.07150900 |
| C | 0.25603300 | -0.27651700 | 2.45581700 |
| C | 1.47236000 | -0.03191600 | 3.08705300 |
| C | 5.19894100 | -0.77384000 | 2.85799800 |
| C | 5.05733900 | -1.96111800 | 3.57502900 |
| C | 5.90992600 | -3.04926400 | 3.43701800 |
| C | 6.95986600 | -2.96592500 | 2.52461200 |
| C | 7.13720500 | -1.80515800 | 1.77801000 |
| C | 6.25926200 | -0.73585500 | 1.95265900 |
| B | 4.12758300 | 0.42178500  | 3.00911000 |

Table S28

M06-2X-D3/def2-TZVP

**B/Bi-Prod**

| Atomic<br>Number | Coordinates (Angstroms) |             |             |
|------------------|-------------------------|-------------|-------------|
|                  | X                       | Y           | Z           |
| F                | 3.68719900              | 0.11323100  | 0.18208500  |
| F                | 1.34741000              | -0.30684300 | -1.07087800 |
| F                | -0.93439400             | -0.57925400 | 0.37508300  |
| F                | -0.84700800             | -0.41130700 | 3.08545600  |
| F                | 1.44797200              | 0.03207700  | 4.34321700  |
| F                | 3.82066500              | -2.00160000 | 4.32225000  |
| F                | 5.43679300              | -4.14866500 | 4.21323500  |
| F                | 7.65824100              | -4.09235800 | 2.65037400  |
| F                | 8.24025300              | -1.87856900 | 1.19856500  |
| F                | 6.63501300              | 0.25595900  | 1.28693900  |
| O                | 4.23337800              | 2.56421100  | 1.51374300  |

|    |            |             |            |
|----|------------|-------------|------------|
| Bi | 6.62155700 | 2.87116300  | 3.45972200 |
| Bi | 4.05080400 | 1.09440100  | 5.24046600 |
| C  | 4.74197200 | 1.89412000  | 2.36840500 |
| C  | 5.69208200 | 2.30630000  | 5.44523800 |
| H  | 6.03959700 | 2.66955300  | 6.42026700 |
| C  | 3.19565000 | 0.35373300  | 7.22822800 |
| H  | 4.00119600 | 0.60287300  | 7.93389800 |
| C  | 2.95878600 | -1.14539500 | 7.16115300 |
| H  | 2.22979600 | -1.39672900 | 6.37721900 |
| H  | 2.54896200 | -1.49194500 | 8.12462400 |
| H  | 3.87865100 | -1.71145400 | 6.96200500 |
| C  | 1.93484600 | 1.14756400  | 7.53385300 |
| H  | 2.12458500 | 2.22796800  | 7.60117900 |
| H  | 1.52128900 | 0.81901800  | 8.50199300 |
| H  | 1.16128200 | 0.97593300  | 6.77053900 |
| C  | 5.58052000 | 4.90146800  | 3.17472100 |
| H  | 5.41238500 | 4.87193300  | 2.08573800 |
| C  | 6.51749200 | 6.04352000  | 3.54465700 |
| H  | 6.73781800 | 6.04779300  | 4.62426000 |
| H  | 6.05705800 | 7.01728300  | 3.30490800 |
| H  | 7.47590500 | 5.99081600  | 3.00695200 |
| C  | 4.23964700 | 4.99109200  | 3.88084500 |
| H  | 3.55990000 | 4.18007000  | 3.57788700 |
| H  | 3.74216600 | 5.94474700  | 3.63361800 |
| H  | 4.35452100 | 4.94617500  | 4.97532600 |
| C  | 2.67179300 | 0.14103000  | 2.30340500 |
| C  | 2.58182000 | 0.02708500  | 0.91428000 |
| C  | 1.38418800 | -0.20649200 | 0.24623500 |
| C  | 0.21346700 | -0.35185100 | 0.98664000 |
| C  | 0.25923700 | -0.26301400 | 2.37393000 |
| C  | 1.48014700 | -0.02660400 | 3.00102300 |
| C  | 5.16712800 | -0.78011900 | 2.82536400 |
| C  | 4.90151700 | -1.95010400 | 3.53720200 |
| C  | 5.72231900 | -3.07005200 | 3.50356100 |
| C  | 6.86383400 | -3.04060000 | 2.70412400 |
| C  | 7.16307700 | -1.90086700 | 1.96345900 |
| C  | 6.31524700 | -0.79648700 | 2.03331800 |
| B  | 4.14459100 | 0.45041200  | 2.85363100 |

-----
